# Supplementary material for: Culicidae evolutionary history focusing on the Culicinae subfamily based on mitochondrial phylogenomics
Source: PubMed Central journal article supplement (PMC7606482; doi:10.1038/s41598-020-74883-3), 2020-11-02
Supplement: 41598_2020_74883_MOESM1_ESM.pdf [file 41598_2020_74883_MOESM1_ESM.pdf]

**Additional information for**

**Culicidae evolutionary history focusing on the Culicinae subfamily based on mitochondrial phylogenomics**

Alexandre Freitas da Silva<sup>1</sup>, Laís Ceschini Machado<sup>1</sup>, Marcia Bicudo de Paula<sup>2</sup>, Carla Júlia da Silva Pessoa<sup>3</sup> Vieira, Roberta Vieira de Moraes Bronzoni<sup>3</sup>, Maria Alice Varjal de Melo Santos<sup>1</sup>, Gabriel Luz Wallau<sup>1,\*</sup>

<sup>1</sup> Programa de Pós-Graduação em Biociências e Biotecnologia em Saúde; Departamento de Entomologia, Fundação Oswaldo Cruz - Instituto Aggeu Magalhães, Recife, 50670-420, Brasil, <sup>2</sup> Faculdade de Saúde Pública, Universidade de São Paulo, São Paulo, 01246-904, Brasil, <sup>3</sup> Universidade Federal de Mato Grosso, Sinop, 78550-728, Brasil.

\*gabriel.wallau@cpqam.fiocruz.br

**Supplementary table 1.** Annotation of draft mitogenomes using MITOS.

| Species                     | <i>nad2</i> | <i>COI</i> | <i>COII</i> | <i>atp8</i> | <i>atp6</i> | <i>COIII</i> | <i>nad3</i> | <i>nad5</i> | <i>nad4</i> | <i>nad4l</i> | <i>nad6</i> | <i>cytb</i> | <i>nad1</i> | <i>rrnL</i> | <i>rrnS</i> | <i>tRNA</i> | <i>PCG</i> | <i>rRNA</i> | Total of genes |
|-----------------------------|-------------|------------|-------------|-------------|-------------|--------------|-------------|-------------|-------------|--------------|-------------|-------------|-------------|-------------|-------------|-------------|------------|-------------|----------------|
| <i>Ad. squamipennis</i>     | 1           | 1          | 1           | -           | -           | 1            | 1           | 1           | <b>1</b>    | -            | -           | 1           | 1           | <b>1</b>    | 1           | 16          | 9          | 2           | 27             |
| <i>Ae. alboannulatus</i>    | 1           | 1          | 1           | -           | -           | <b>1</b>     | 1           | 1           | 1           | <b>1</b>     | 1           | <b>1</b>    | <b>1</b>    | 1           | 1           | 13          | 11         | 2           | 26             |
| <i>Ae. camptorhynchus</i>   | 1           | 1          | 1           | 1           | -           | <b>1</b>     | 1           | <b>1</b>    | 1           | <b>1</b>     | 1           | <b>1</b>    | <b>1</b>    | 1           | 1           | 16          | 12         | 2           | 30             |
| <i>Ae. detritus</i>         | 1           | 1          | 1           | 1           | 1           | <b>1</b>     | 1           | <b>1</b>    | <b>1</b>    | <b>1</b>     | 1           | <b>1</b>    | <b>1</b>    | 1           | 1           | 16          | 13         | 2           | 31             |
| <i>Ae. fluviatilis</i>      | 1           | 1          | 1           | 1           | 1           | 1            | -           | <b>1</b>    | 1           | <b>1</b>     | 1           | <b>1</b>    | 1           | 1           | -           | 4           | 12         | 1           | 17             |
| <i>Ae. polynesiensis</i>    | 1           | 1          | 1           | <b>1</b>    | -           | <b>1</b>     | 1           | <b>1</b>    | <b>1</b>    | 1            | 1           | <b>1</b>    | <b>1</b>    | 1           | 1           | 20          | 12         | 2           | 34             |
| <i>Ae. riversi</i>          | -           | 1          | 1           | 1           | 1           | 1            | 1           | <b>1</b>    | 1           | -            | -           | <b>1</b>    | 1           | 1           | -           | 6           | 10         | 1           | 17             |
| <i>Ae. scapularis</i>       | 1           | <b>1</b>   | 1           | 1           | <b>1</b>    | 1            | -           | <b>1</b>    | 1           | -            | 1           | <b>1</b>    | 1           | -           | 1           | 13          | 11         | 1           | 25             |
| <i>Ae. taeniorhynchus</i>   | 1           | 1          | 1           | 1           | 1           | 1            | 1           | 1           | 1           | <b>1</b>     | 1           | 1           | 1           | 1           | 1           | 22          | 13         | 2           | 37             |
| <i>An. albimanus</i>        | 1           | 1          | 1           | <b>1</b>    | -           | <b>1</b>     | 1           | <b>1</b>    | <b>1</b>    | <b>1</b>     | 1           | <b>1</b>    | <b>1</b>    | 1           | 1           | 20          | 12         | 2           | 34             |
| <i>An. aquasalis</i>        | 1           | 1          | 1           | 1           | -           | <b>1</b>     | -           | 1           | 1           | -            | -           | <b>1</b>    | 1           | 1           | <b>1</b>    | 3           | 9          | 2           | 14             |
| <i>An. freeborni</i>        | 1           | 1          | 1           | <b>1</b>    | -           | <b>1</b>     | 1           | <b>1</b>    | 1           | <b>1</b>     | 1           | <b>1</b>    | <b>1</b>    | 1           | 1           | 19          | 12         | 2           | 33             |
| <i>An. nuneztovari</i>      | 1           | 1          | 1           | 1           | -           | <b>1</b>     | 1           | <b>1</b>    | 1           | 1            | 1           | <b>1</b>    | 1           | 1           | 1           | 9           | 12         | 2           | 23             |
| <i>An. quadriannulatus</i>  | 1           | 1          | 1           | <b>1</b>    | -           | <b>1</b>     | 1           | <b>1</b>    | <b>1</b>    | <b>1</b>     | 1           | <b>1</b>    | <b>1</b>    | 1           | 1           | 20          | 12         | 2           | 34             |
| <i>Cq. albicosta</i>        | 1           | 1          | 1           | <b>1</b>    | 1           | 1            | 1           | 1           | <b>1</b>    | <b>1</b>     | 1           | 1           | 1           | 1           | 1           | 21          | 13         | 2           | 36             |
| <i>Cq. chrysonotum</i>      | <b>1</b>    | 1          | 1           | -           | 1           | 1            | 1           | 1           | 1           | 1            | 1           | <b>1</b>    | 1           | 1           | 1           | 20          | 12         | 2           | 34             |
| <i>Cq. hermanoi</i>         | <b>1</b>    | 1          | 1           | 1           | 1           | 1            | 1           | <b>1</b>    | 1           | -            | -           | 1           | -           | 1           | 1           | 14          | 10         | 2           | 26             |
| <i>Cq. juxtamazonia</i>     | 1           | 1          | 1           | -           | 1           | 1            | -           | 1           | 1           | -            | -           | 1           | -           | 1           | 1           | 8           | 8          | 2           | 18             |
| <i>Cq. venezuelensis</i>    | 1           | 1          | 1           | 1           | 1           | 1            | 1           | <b>1</b>    | <b>1</b>    | <b>1</b>     | 1           | 1           | 1           | 1           | 1           | 19          | 13         | 2           | 34             |
| <i>Cx. amazonensis</i>      | 1           | 1          | 1           | <b>1</b>    | 1           | 1            | 1           | 1           | 1           | 1            | 1           | 1           | 1           | 1           | 1           | 21          | 13         | 2           | 36             |
| <i>Cx. australicus</i>      | 1           | 1          | 1           | 1           | 1           | 1            | 1           | <b>1</b>    | 1           | <b>1</b>     | 1           | <b>1</b>    | 1           | 1           | 1           | 17          | 13         | 2           | 32             |
| <i>Cx. corniger</i>         | 1           | 1          | <b>1</b>    | 1           | -           | 1            | -           | 1           | 1           | 1            | -           | 1           | -           | 1           | <b>1</b>    | 9           | 9          | 2           | 20             |
| <i>Cx. globocoxitus</i>     | 1           | 1          | 1           | 1           | -           | <b>1</b>     | 1           | <b>1</b>    | 1           | <b>1</b>     | 1           | <b>1</b>    | <b>1</b>    | 1           | 1           | 17          | 12         | 2           | 31             |
| <i>Cx. hortensis</i>        | 1           | 1          | 1           | -           | -           | <b>1</b>     | 1           | <b>1</b>    | 1           | 1            | 1           | <b>1</b>    | <b>1</b>    | 1           | 1           | 12          | 11         | 2           | 25             |
| <i>Cx. pipiens molestus</i> | <b>1</b>    | 1          | 1           | 1           | 1           | 1            | 1           | <b>1</b>    | 1           | <b>1</b>     | 1           | <b>1</b>    | 1           | 1           | 1           | 6           | 13         | 2           | 21             |
| <i>Cx. nigripalpus</i>      | 1           | 1          | 1           | 1           | 1           | 1            | 1           | 1           | <b>1</b>    | <b>1</b>     | 1           | 1           | 1           | 1           | 1           | 22          | 13         | 2           | 37             |
| <i>Cx. tarsalis</i>         | 1           | 1          | 1           | 1           | -           | <b>1</b>     | 1           | <b>1</b>    | <b>1</b>    | <b>1</b>     | 1           | <b>1</b>    | <b>1</b>    | 1           | 1           | 19          | 12         | 2           | 33             |
| <i>Cx. torrentium</i>       | 1           | 1          | 1           | 1           | 1           | 1            | 1           | <b>1</b>    | 1           | <b>1</b>     | 1           | <b>1</b>    | 1           | 1           | 1           | 11          | 13         | 2           | 26             |
| <i>Ma. wilsoni</i>          | 1           | 1          | 1           | 1           | 1           | 1            | 1           | 1           | <b>1</b>    | 1            | -           | 1           | 1           | 1           | 1           | 14          | 12         | 2           | 28             |
| <i>Ma.humeralis</i>         | -           | 1          | <b>1</b>    | -           | 1           | -            | 1           | <b>1</b>    | -           | -            | -           | 1           | 1           | 1           | 1           | 5           | 7          | 2           | 14             |
| <i>Ma.titillans</i>         | <b>1</b>    | 1          | <b>1</b>    | -           | 1           | 1            | 1           | 1           | <b>1</b>    | -            | 1           | 1           | 1           | 1           | 1           | 14          | 11         | 2           | 27             |
| <i>Ps. cingulata</i>        | <b>1</b>    | 1          | 1           | 1           | 1           | 1            | 1           | 1           | <b>1</b>    | 1            | <b>1</b>    | <b>1</b>    | <b>1</b>    | 1           | 1           | 21          | 13         | 2           | 36             |
| <i>Ps.albipes</i>           | 1           | 1          | 1           | 1           | -           | <b>1</b>     | 1           | <b>1</b>    | <b>1</b>    | <b>1</b>     | 1           | 1           | <b>1</b>    | 1           | 1           | 19          | 12         | 2           | 33             |
| <i>Tp. aranoioides</i>      | 1           | 1          | -           | -           | -           | <b>1</b>     | -           | 1           | -           | 1            | -           | <b>1</b>    | 1           | 1           | 1           | -           | 7          | 2           | 9              |
| <i>Tr. digitatum</i>        | <b>1</b>    | 1          | 1           | -           | 1           | 1            | 1           | 1           | <b>1</b>    | <b>1</b>     | -           | <b>1</b>    | -           | <b>1</b>    | 1           | 16          | 10         | 2           | 28             |
| <i>Tx. amboinensis</i>      | 1           | 1          | 1           | 1           | 1           | <b>1</b>     | 1           | <b>1</b>    | <b>1</b>    | <b>1</b>     | 1           | <b>1</b>    | 1           | <b>1</b>    | 1           | 19          | 13         | 2           | 34             |
| <i>Ur. pulcherrima</i>      | 1           | <b>1</b>   | 1           | -           | 1           | 1            | 1           | 1           | 1           | 1            | 1           | <b>1</b>    | 1           | 1           | 1           | 18          | 12         | 2           | 32             |

Legend: Bold names represent sequenced mitogenomes. Disrupted or duplicated gene are represented by bold numbers. Unidentified gene are represented by -.

**Supplementary table 2.** Predicted TMRCA values from Bayesian inference analysis for studied species clades.

| Node* | HPD 95% <sup>1</sup> | Median dating <sup>1</sup> | PP of analysis <sub>1</sub> | PP of analysis <sub>2</sub> | UFboot of analysis <sub>2</sub> | PP of analysis <sub>3</sub> | PP of analysis <sub>4</sub> | PP of analysis <sub>5</sub> | UFboot of analysis <sub>5</sub> | PP of analysis <sup>6</sup> | UFboot of analysis <sup>7</sup> |
|-------|----------------------|----------------------------|-----------------------------|-----------------------------|---------------------------------|-----------------------------|-----------------------------|-----------------------------|---------------------------------|-----------------------------|---------------------------------|
| A     | 243.79-332.41        | 273.74                     | 1                           | 1                           | -                               | 1                           | 1                           | 1                           | -                               | 1                           | -                               |
| B     | 145.88-232.95        | 182.75                     | 1                           | 1                           | -                               | 1                           | 1                           | 1                           | -                               | 1                           | -                               |
| F     | 128.09-204.91        | 160.86                     | 1                           | -                           | -                               | -                           | -                           | -                           | -                               | -                           | -                               |
| I     | 124.77-200.69        | 157.02                     | 0.49                        | 0.81                        | -                               | 0.49                        | -                           | 0.96                        | 69                              | 0.99                        | -                               |
| H     | 117.92-195.06        | 151.36                     | 0.5                         | -                           | -                               | -                           | -                           | -                           | -                               | -                           | -                               |
| C     | 114.58-187.29        | 145.83                     | 1                           | 1                           | 100                             | 1                           | 1                           | 1                           | 100                             | 1                           | 100                             |
| N     | 101.87-168.21        | 130.49                     | 1                           | 1                           | 93                              | 1                           | 1                           | 0.99                        | 92                              | 1                           | 79                              |
| J     | 88.78-146.1          | 113.73                     | 1                           | 1                           | 100                             | 1                           | 1                           | -                           | -                               | 0.81                        | 83                              |
| D     | 87.14-141.71         | 110.73                     | 1                           | 1                           | 100                             | 1                           | 1                           | 1                           | 100                             | 1                           | 100                             |
| U     | 79.07-135.87         | 103.9                      | 1                           | 1                           | 100                             | 1                           | 1                           | 1                           | 100                             | 1                           | 100                             |
| O     | 81.02-132.17         | 102.87                     | 1                           | 1                           | 100                             | 1                           | 1                           | 1                           | 100                             | 1                           | 100                             |
| Q     | 74.02-121.02         | 94.04                      | 1                           | 1                           | 100                             | 1                           | 1                           | 1                           | 100                             | 1                           | -                               |
| K     | 66.37-115.22         | 88.32                      | 1                           | 1                           | 100                             | 1                           | 1                           | 1                           | 100                             | 1                           | 100                             |
| L     | 66.31-109.73         | 85.29                      | 1                           | 1                           | 100                             | 1                           | 1                           | 1                           | 100                             | 1                           | 100                             |
| S     | 53.53-88.54          | 68.94                      | 1                           | -                           | 100                             | 1                           | 1                           | -                           | -                               | -                           | -                               |
| P     | 45.84-84.94          | 63.25                      | 1                           | 1                           | 100                             | 1                           | 1                           | 1                           | 100                             | 1                           | 100                             |
| T     | 43.26-73.19          | 56.37                      | 0.92                        | -                           | 65                              | 0.95                        | -                           | -                           | -                               | -                           | -                               |
| R     | 24.82-45.09          | 33.9                       | 1                           | 1                           | 100                             | 1                           | 1                           | 1                           | 100                             | 1                           | 100                             |
| V     | 16.73-28.91          | 22.09                      | 1                           | 1                           | 100                             | 1                           | -                           | -                           | 100                             | 0.85                        | 89                              |
| Z     | 15.05-26.45          | 20.08                      | 1                           | 1                           | 100                             | 1                           | 0.85                        | 0.86                        | 97                              | -                           | 98                              |
| Y     | 9.82-17.37           | 13.15                      | 1                           | 1                           | -                               | 1                           | 1                           | -                           | -                               | 0.96                        | 99                              |
| X     | 7.78-16.85           | 11.85                      | 1                           | 1                           | 100                             | 1                           | 1                           | 1                           | 100                             | 1                           | 99                              |
| M     | 3.13-8.92            | 5.71                       | 1                           | 1                           | 100                             | 1                           | 1                           | 1                           | 100                             | 1                           | 100                             |
| E     | 2.35-4.42            | 3.27                       | 1                           | 1                           | 100                             | 1                           | 1                           | 1                           | 100                             | 1                           | 100                             |
| G     | 1.43-2.81            | 2.04                       | 1                           | 1                           | 100                             | 1                           | 1                           | 1                           | -                               | 1                           | -                               |

The HPD95% values represent the confidence intervals for each node. PP represents the probability posterior. UFboot represents ultrafast bootstrapping. \* Nodes present in Fig. 3 and Fig. 4. <sup>1</sup> Analysis based on partitioned PCG with codon partition (1st + 2nd and 3rd separately). <sup>2</sup> Analysis based on complete mitogenome sequences. <sup>3</sup> Analysis based on partitioned PCG without codon partition. <sup>4</sup> Analysis based on Partitioned PCG without 3rd codon positions. <sup>5</sup> Analysis based on concatenated predicted amino acid sequences. <sup>6</sup> Analysis based on partitioned predicted amino acid sequences. <sup>7</sup> Analysis based on concatenated PCG without 3rd codon position.

**Supplementary table 3.** Information of sequenced samples.

| Taxon                     | Genus          | Subgenus       | Tribe         | N° of specimens | Location                           | N° of reads (Mi) |
|---------------------------|----------------|----------------|---------------|-----------------|------------------------------------|------------------|
| <i>Ad. squamipennis</i>   | Aedeomyia      | Aedeomyia      | Aedeomyiini   | 3               | Aldeia-PE+REC <sup>2</sup>         | 3.9              |
| <i>Ae. scapularis</i>     | Aedes          | Ochlerotatus   | Aedini        | 7               | Juazeiro-BA                        | 7                |
| <i>Ae. taeniorhynchus</i> | Aedes          | Ochlerotatus   | Aedini        | 10              | São Luís -MA                       | 11.3             |
| <i>Cq. hermanoi</i>       | Coquillettidia | Rhynchoaenia   | Mansoniini    | 1               | Aldeia-PE                          | 1.8              |
| <i>Cq. chrysonotum</i>    | Coquillettidia | Rhynchoaenia   | Mansoniini    | 14              | PDI <sup>1</sup>                   | 6.2              |
| <i>Cq. albicosta</i>      | Coquillettidia | Rhynchoaenia   | Mansoniini    | 3               | PDI <sup>1</sup>                   | 2.4              |
| <i>Cq. juxtamansonia</i>  | Coquillettidia | Rhynchoaenia   | Mansoniini    | 2               | REC <sup>2</sup>                   | 5.5              |
| <i>Cq. venezuelensis</i>  | Coquillettidia | Rhynchoaenia   | Mansoniini    | 4               | PDI <sup>1</sup> +REC <sup>2</sup> | 4.3              |
| <i>Cx. amazonensis</i>    | Culex          | Aedinus        | Culicini      | 1               | REC <sup>2</sup>                   | 2.5              |
| <i>Cx. corniger</i>       | Culex          | Phenacomyia    | Culicini      | 5               | Mato Grosso                        | 3.9              |
| <i>Cx. nigripalpus</i>    | Culex          | Culex          | Culicini      | 6               | PDI <sup>1</sup>                   | 4.8              |
| <i>Ma. titillans</i>      | Mansonia       | Mansonia       | Mansoniini    | 3               | REC <sup>2</sup>                   | 6.6              |
| <i>Ma. wilsoni</i>        | Mansonia       | Mansonia       | Mansoniini    | 2               | REC <sup>2</sup>                   | 8.2              |
| <i>Ma. humeralis</i>      | Mansonia       | Mansonia       | Mansoniini    | 1               | Aldeia-PE                          | 2.2              |
| <i>Ps. cingulata</i>      | Psorophora     | Grabhamia      | Aedini        | 3               | Mato Grosso                        | 4.9              |
| <i>Tr. digitatum</i>      | Trichoprosopon | Trichoprosopon | Sabethini     | 1               | Mato Grosso                        | 7.6              |
| <i>Ur. pulcherrima</i>    | Uranotaenia    | Uranotaenia    | Uranotaeniini | 1               | REC <sup>2</sup>                   | 1.1              |

PE refers to state of Pernambuco, Brazil. MA refers to state of Maranhão, Brazil. BA refers to state of Bahia, Brazil. Mi refers to million of reads. <sup>1</sup> Parque Estadual Dois Irmãos-PE . <sup>2</sup> Reserva Ecológica de Carnijó-PE

**Supplementary table 4.** NCBI accession number of mitochondrial genomes retrieved from NCBI.

| Species                          | Genus     | Subgenus      | Tribe    | Access      | Length (bp) | References * |
|----------------------------------|-----------|---------------|----------|-------------|-------------|--------------|
| <i>Aedes aegypti</i>             | Aedes     | Stegomyia     | Aedini   | NC_010241.1 | 16,655      | 1            |
| <i>Aedes albopictus</i>          | Aedes     | Stegomyia     | Aedini   | NC_006817.1 | 16,665      | -            |
| <i>Aedes notoscriptus</i>        | Aedes     | Finlaya       | Aedini   | KM676218.1  | 15,846      | 2            |
| <i>Aedes vigilax</i>             | Aedes     | Ochlerotatus  | Aedini   | KP995260.1  | 15,877      | 3            |
| <i>Anopheles albitarsis</i>      | Anopheles | Nyssorhynchus | -        | HQ335344.1  | 15,413      | 4            |
| <i>Anopheles bellator</i>        | Anopheles | Kerteszia     | -        | KU551287.1  | 15,668      | 5            |
| <i>Anopheles christyi</i>        | Anopheles | Cellia        | -        | NC_028214.1 | 14,967      | 6            |
| <i>Anopheles cruzii</i>          | Anopheles | Kerteszia     | -        | KJ701506.1  | 15,449      | -            |
| <i>Anopheles culicifacies</i>    | Anopheles | Cellia        | -        | NC_027502.1 | 15,330      | 7            |
| <i>Anopheles darlingi</i>        | Anopheles | Nyssorhynchus | -        | NC_014275.1 | 15,386      | 8            |
| <i>Anopheles deaneorum</i>       | Anopheles | Nyssorhynchus | -        | HQ335347.1  | 15,424      | 4            |
| <i>Anopheles dirus</i>           | Anopheles | Cellia        | -        | JX219731.1  | 15,404      | 9            |
| <i>Anopheles epiroticus</i>      | Anopheles | Cellia        | -        | NC_028217.1 | 15,379      | 6            |
| <i>Anopheles farauti</i>         | Anopheles | Cellia        | -        | NC_020770.1 | 15,412      | 9            |
| <i>Anopheles funestus</i>        | Anopheles | Cellia        | -        | NC_008070.1 | 15,354      | 10           |
| <i>Anopheles gambiae</i>         | Anopheles | Cellia        | -        | NC_002084.1 | 15,363      | 11           |
| <i>Anopheles homunculus</i>      | Anopheles | Kerteszia     | -        | KU551283.1  | 15,739      | 5            |
| <i>Anopheles janconnae</i>       | Anopheles | Nyssorhynchus | -        | HQ335348.1  | 15,425      | 4            |
| <i>Anopheles koliensis</i>       | Anopheles | Cellia        | -        | JX219743.1  | 15,412      | 9            |
| <i>Anopheles melas</i>           | Anopheles | Cellia        | -        | NC_028219.1 | 15,366      | 6            |
| <i>Anopheles merus</i>           | Anopheles | Cellia        | -        | NC_028220.1 | 15,365      | 6            |
| <i>Anopheles punctulatus</i>     | Anopheles | Cellia        | -        | NC_028222.1 | 15,322      | 6            |
| <i>Anopheles quadrimaculatus</i> | Anopheles | Anopheles     | -        | NC_000875.1 | 15,455      | 12           |
| <i>Anopheles sinensis</i>        | Anopheles | Anopheles     | -        | NC_028016.1 | 15,076      | -            |
| <i>Anopheles stephensi</i>       | Anopheles | Cellia        | -        | NC_028223.1 | 15,387      | 6            |
| <i>Bironella hollandi</i>        | Bironella | Brugella      | -        | NC_037796.1 | 15,772      | 13           |
| <i>Chagasia sp.</i>              | Chagasia  | -             | -        | MF381717.1  | 15,717      | 13           |
| <i>Culex bidens</i>              | Culex     | Culex         | Culicini | NC_037809.1 | 15,583      | 13           |
| <i>Culex gelidus</i>             | Culex     | Culex         | Culicini | KX753344.1  | 15,600      | 14           |
| <i>Culex bilineatus</i>          | Culex     | Culex         | Culicini | NC_037819.1 | 15,599      | 13           |
| <i>Culex brami</i>               | Culex     | Culex         | Culicini | NC_037828.1 | 15,586      | 13           |
| <i>Culex camposi</i>             | Culex     | Culex         | Culicini | NC_036008.1 | 15,570      | 15           |

|                                |            |               |              |             |        |    |
|--------------------------------|------------|---------------|--------------|-------------|--------|----|
| <i>Culex coronator</i>         | Culex      | Culex         | Culicini     | NC_036006.1 | 15,576 | 15 |
| <i>Culex declarator</i>        | Culex      | Culex         | Culicini     | NC_037822.1 | 15,575 | 13 |
| <i>Culex dolosus</i>           | Culex      | Culex         | Culicini     | MF381620.1  | 15,851 | 13 |
| <i>Culex chidesteri</i>        | Culex      | Culex         | Culicini     | NC_037826.1 | 16,052 | 13 |
| <i>Culex lygrus</i>            | Culex      | Culex         | Culicini     | MF381718.1  | 15,572 | 13 |
| <i>Culex mollis</i>            | Culex      | Culex         | Culicini     | MF381705.1  | 15,576 | 13 |
| <i>Culex pipiens pallens</i>   | Culex      | Culex         | Culicini     | KT851543.1  | 15,617 | 16 |
| <i>Culex pipiens pipiens</i>   | Culex      | Culex         | Culicini     | NC_015079.1 | 14,856 | -  |
| <i>Culex quinquefasciatus</i>  | Culex      | Culex         | Culicini     | NC_014574.1 | 15,587 | 1  |
| <i>Culex surinamensis</i>      | Culex      | Culex         | Culicini     | MF381615.1  | 15,568 | 13 |
| <i>Culex tritaeniorhynchus</i> | Culex      | Culex         | Culicini     | KT851544.1  | 14,844 | 16 |
| <i>Culex usquatissimus</i>     | Culex      | Culex         | Culicini     | NC_036007.1 | 15,574 | 15 |
| <i>Culex usquatus</i>          | Culex      | Culex         | Culicini     | NC_036005.1 | 15,573 | 15 |
| <i>Drosophila melanogaster</i> | Drosophila | Drosophilinae | Drosophilini | U37541.1    | 19,517 | 17 |
| <i>Haemagogus janthinomys</i>  | Haemagogus | Haemagogus    | Aedini       | NC_028025.1 | 15,698 | 18 |
| <i>Sabethes belisarioi</i>     | Sabethes   | Sabethes      | Sabethini    | MF957171.1  | 15,911 | 19 |
| <i>Sabethes chloropterus</i>   | Sabethes   | Sabethoides   | Sabethini    | NC_037499.1 | 15,609 | 19 |
| <i>Sabethes glaucodaemon</i>   | Sabethes   | Sabethoides   | Sabethini    | NC_037500.1 | 15,620 | 19 |

\* References listed at the end of the document.

**Supplementary table 5.** Information about retrieved raw sequencing datasets from NCBI SRA database.

| Species                     | Genus     | Subgenus      | Tribe    | SRA accession number | Original study                         |
|-----------------------------|-----------|---------------|----------|----------------------|----------------------------------------|
| <i>Ae. alboannulatus</i>    | Aedes     | Finlaya       | Aedini   | SRR5665565           | RNA-Seq (Species virome)               |
| <i>Ae. camptorhynchus</i>   | Aedes     | Ochlerotatus  | Aedini   | SRR5665568           | RNA-Seq (Species virome)               |
| <i>Ae. detritus</i>         | Aedes     | Ochlerotatus  | Aedini   | SRR6489869           | RNA-Seq (Differential gene expression) |
| <i>Ae. fluviatilis</i>      | Aedes     | Ochlerotatus  | Aedini   | SRR3574348           | RNA-Seq (Differential gene expression) |
| <i>Ae. polynesiensis</i>    | Aedes     | Stegomyia     | Aedini   | ERR1706659           | RNA-Seq (Comparative transcriptomes)   |
| <i>Ae. riversi</i>          | Aedes     | Stegomyia     | Aedini   | ERR1706661           | RNA-Seq (Comparative transcriptomes)   |
| <i>An. albimanus</i>        | Anopheles | Nyssorhynchus | -        | SRR314655            | Genome sequencing                      |
| <i>An. aquasalis</i>        | Anopheles | Nyssorhynchus | -        | SRR927456            | RNA-Seq (Transcriptome)                |
| <i>An. freeborni</i>        | Anopheles | Anopheles     | -        | SRR908289            | RNA-Seq (Saliva transcriptome)         |
| <i>An. nuneztovari</i>      | Anopheles | Nyssorhynchus | -        | SRR6471062           | RNA-Seq (Saliva transcriptome)         |
| <i>An. quadriannulatus</i>  | Anopheles | Cellia        | -        | SRR529986            | Genome sequencing                      |
| <i>Cx. australicus</i>      | Culex     | Culex         | Culicini | SRR5665566           | RNA-Seq (Species virome)               |
| <i>Cx. globocoxitus</i>     | Culex     | Culex         | Culicini | SRR5665567           | RNA-Seq (Species virome)               |
| <i>Cx. hortensis</i>        | Culex     | Maillotia     | Culicini | SRR1324883           | RNA-Seq (Comparative transcriptomes)   |
| <i>Cx. pipiens molestus</i> | Culex     | Culex         | Culicini | SRR1462325           | RNA-Seq (Comparative transcriptomes)   |
| <i>Cx. tarsalis</i>         | Culex     | Culex         | Culicini | SRR5149179           | RNA-Seq (Transcriptome)                |
| <i>Cx. torrentium</i>       | Culex     | Culex         | Culicini | SRR1324895           | RNA-Seq                                |

|                        |                |                |                 |            |                                                                |
|------------------------|----------------|----------------|-----------------|------------|----------------------------------------------------------------|
| <i>Ps. albipes</i>     | Psorophora     | Janthinossoma  | Aedini          | SRR908278  | (Comparative transcriptomes)<br>RNA-Seq (Saliva transcriptome) |
| <i>Tp. aranoides</i>   | Tripteroides   | Rachionotomyia | Sabethini       | SRR6155938 | RNA-Seq (Transcriptome)                                        |
| <i>Tx. amboinensis</i> | Toxorhynchites | Toxorhynchites | Toxorhynchitini | SRR2061845 | RNA-Seq (Transcriptome)                                        |



**Supplementary table 6.** Calibration points used in BEAST 1.8.4

| Clade              | Represented taxa                            | Minimum bound | Maximum bound | References                                              |
|--------------------|---------------------------------------------|---------------|---------------|---------------------------------------------------------|
| <i>Diptera</i>     | <i>Culicidae</i> and <i>D. melanogaster</i> | 240           | 241           | KRZEMIŃSKI, KRZEMIŃSKA & PAPIER, 1994 <sup>20</sup>     |
| <i>Culicidae</i>   | <i>Culicinae</i> e <i>Anophelinae</i>       | 90            | 99            | BORKENT & GRIMALDI, 2004 <sup>21</sup>                  |
| <i>Culicinae</i>   | <i>Culicinae</i>                            | 76.5          | 79            | POINAR, ZAVORTINK., PIKE & JOHNSTON, 2000 <sup>22</sup> |
| <i>Anophelinae</i> | <i>Anophelinae</i>                          | 15            | 34            | ZAVORTINK & POINAR, 2000 <sup>23</sup>                  |

**Supplementary table 7.** Evolutionary models used in BEAST analysis.

| Partition                       | Best nucleotide model <sup>1</sup> | Best protein model <sup>2</sup> |
|---------------------------------|------------------------------------|---------------------------------|
| Nucleotide mitogenome alignment | GTR+G+I                            | -                               |
| Concatenated protein alignment  | -                                  | mtREV+G+I                       |
| Atp6                            | GTR+G+I                            | mtREV+G+I                       |
| Atp8                            | GTR+G                              | JTT+G+I                         |
| COIII                           | GTR+G+I                            | mtREV+G+I                       |
| COII                            | GTR+G+I                            | mtREV+G                         |
| COI                             | GTR+G+I                            | JTT+G+I                         |
| CytB                            | GTR +G+I                           | mtREV+G+I                       |
| Nad1                            | GTR +G+I                           | JTT+G+I                         |
| Nad2                            | GTR +G+I                           | JTT+G                           |
| Nad3                            | GTR +G+I                           | mtREV+G+I                       |
| Nad4L                           | GTR +G+I                           | mtREV+G                         |
| Nad4                            | GTR +G+I                           | JTT+G+I                         |
| Nad5                            | GTR +G+I                           | JTT+G                           |
| Nad6                            | GTR +G+I                           | mtREV+G                         |
| rrnL                            | GTR +G+I                           | -                               |
| rrnS                            | GTR +G+I                           | -                               |

<sup>1</sup>Best model as suggested by SMS. <sup>2</sup> More likely model suggested by Prottest and present in BEAST 1.8.4.

## Supplementary file 1. Test of substitution saturation of mitochondrial PCG.

Analysis performed on all sites.

Testing whether the observed Iss is significantly lower than Iss.c.

IssSym is Iss.c assuming a symmetrical topology.

IssAsym is Iss.c assuming an asymmetrical topology.

Note: two-tailed tests are used.

### COI 1st+2nd codon positions:

| NumOTU | Iss   | Iss.cSym | T      | DF   | P      | Iss.cAsym | T      | DF   | P      |
|--------|-------|----------|--------|------|--------|-----------|--------|------|--------|
| 4      | 0,119 | 0,821    | 72,061 | 1023 | 0,0000 | 0,789     | 68,777 | 1023 | 0,0000 |
| 8      | 0,120 | 0,789    | 64,934 | 1023 | 0,0000 | 0,684     | 54,715 | 1023 | 0,0000 |
| 16     | 0,124 | 0,773    | 64,019 | 1023 | 0,0000 | 0,576     | 44,550 | 1023 | 0,0000 |
| 32     | 0,147 | 0,750    | 59,214 | 1023 | 0,0000 | 0,445     | 29,334 | 1023 | 0,0000 |

### COI 3rd codon positions:

| NumOTU | Iss   | Iss.cSym | T      | DF  | P      | Iss.cAsym | T      | DF  | P      |
|--------|-------|----------|--------|-----|--------|-----------|--------|-----|--------|
| 4      | 0,537 | 0,796    | 11,883 | 510 | 0,0000 | 0,762     | 10,330 | 510 | 0,0000 |
| 8      | 0,580 | 0,753    | 7,928  | 510 | 0,0000 | 0,641     | 2,812  | 510 | 0,0051 |
| 16     | 0,600 | 0,722    | 5,837  | 510 | 0,0000 | 0,513     | 4,163  | 510 | 0,0000 |
| 32     | 0,608 | 0,703    | 4,751  | 510 | 0,0000 | 0,378     | 11,490 | 510 | 0,0000 |

### COII 1st+2nd codon positions:

| NumOTU | Iss   | Iss.cSym | T      | DF  | P      | Iss.cAsym | T      | DF  | P      |
|--------|-------|----------|--------|-----|--------|-----------|--------|-----|--------|
| 4      | 0,258 | 0,793    | 31,684 | 456 | 0,0000 | 0,759     | 29,701 | 456 | 0,0000 |
| 8      | 0,224 | 0,747    | 30,309 | 456 | 0,0000 | 0,636     | 23,846 | 456 | 0,0000 |
| 16     | 0,274 | 0,713    | 25,787 | 456 | 0,0000 | 0,504     | 13,505 | 456 | 0,0000 |
| 32     | 0,285 | 0,697    | 25,475 | 456 | 0,0000 | 0,371     | 5,276  | 456 | 0,0000 |

### COII 3rd codon positions:

| NumOTU | Iss   | Iss.cSym | T     | DF  | P      | Iss.cAsym | T      | DF  | P      |
|--------|-------|----------|-------|-----|--------|-----------|--------|-----|--------|
| 4      | 0,630 | 0,777    | 4,490 | 227 | 0,0000 | 0,762     | 4,033  | 227 | 0,0001 |
| 8      | 0,673 | 0,732    | 1,878 | 227 | 0,0617 | 0,631     | 1,319  | 227 | 0,1885 |
| 16     | 0,718 | 0,654    | 2,087 | 227 | 0,0380 | 0,459     | 8,498  | 227 | 0,0000 |
| 32     | 0,750 | 0,685    | 2,250 | 227 | 0,0254 | 0,363     | 13,387 | 227 | 0,0000 |

### COIII 1st+2nd codon positions:

| NumOTU | Iss   | Iss.cSym | T      | DF  | P      | Iss.cAsym | T      | DF  | P      |
|--------|-------|----------|--------|-----|--------|-----------|--------|-----|--------|
| 4      | 0,230 | 0,797    | 34,999 | 525 | 0,0000 | 0,764     | 32,946 | 525 | 0,0000 |
| 8      | 0,236 | 0,754    | 32,263 | 525 | 0,0000 | 0,643     | 25,328 | 525 | 0,0000 |
| 16     | 0,261 | 0,725    | 29,985 | 525 | 0,0000 | 0,515     | 16,431 | 525 | 0,0000 |
| 32     | 0,281 | 0,705    | 29,101 | 525 | 0,0000 | 0,378     | 6,659  | 525 | 0,0000 |

### COIII 3rd codon positions:

| NumOTU | Iss   | Iss.cSym | T     | DF  | P      | Iss.cAsym | T     | DF  | P      |
|--------|-------|----------|-------|-----|--------|-----------|-------|-----|--------|
| 4      | 0,651 | 0,778    | 4,004 | 262 | 0,0001 | 0,758     | 3,356 | 262 | 0,0009 |

|    |       |       |       |     |        |       |        |     |        |
|----|-------|-------|-------|-----|--------|-------|--------|-----|--------|
| 8  | 0,716 | 0,732 | 0,487 | 262 | 0,6265 | 0,627 | 2,761  | 262 | 0,0062 |
| 16 | 0,748 | 0,666 | 2,525 | 262 | 0,0121 | 0,465 | 8,773  | 262 | 0,0000 |
| 32 | 0,796 | 0,682 | 3,501 | 262 | 0,0005 | 0,356 | 13,527 | 262 | 0,0000 |

**ND1 1st+2nd codon positions:**

| NumOTU | Iss   | Iss.cSym | T      | DF  | P      | Iss.cAsym | T      | DF  | P      |
|--------|-------|----------|--------|-----|--------|-----------|--------|-----|--------|
| 4      | 0,232 | 0,803    | 41,973 | 627 | 0,0000 | 0,772     | 39,681 | 627 | 0,0000 |
| 8      | 0,270 | 0,763    | 31,688 | 627 | 0,0000 | 0,653     | 24,621 | 627 | 0,0000 |
| 16     | 0,257 | 0,741    | 33,136 | 627 | 0,0000 | 0,530     | 18,739 | 627 | 0,0000 |
| 32     | 0,307 | 0,715    | 27,312 | 627 | 0,0000 | 0,388     | 5,436  | 627 | 0,0000 |

**ND1 3rd codon positions:**

| NumOTU | Iss   | Iss.cSym | T     | DF  | P      | Iss.cAsym | T      | DF  | P      |
|--------|-------|----------|-------|-----|--------|-----------|--------|-----|--------|
| 4      | 0,616 | 0,782    | 5,860 | 313 | 0,0000 | 0,756     | 4,938  | 313 | 0,0000 |
| 8      | 0,773 | 0,735    | 1,302 | 313 | 0,1939 | 0,626     | 5,017  | 313 | 0,0000 |
| 16     | 0,787 | 0,682    | 3,693 | 313 | 0,0003 | 0,475     | 10,927 | 313 | 0,0000 |
| 32     | 0,776 | 0,683    | 3,322 | 313 | 0,0010 | 0,354     | 15,165 | 313 | 0,0000 |

**ND2 1st+2nd codon positions:**

| NumOTU | Iss   | Iss.cSym | T      | DF  | P      | Iss.cAsym | T      | DF  | P      |
|--------|-------|----------|--------|-----|--------|-----------|--------|-----|--------|
| 4      | 0,462 | 0,806    | 19,700 | 683 | 0,0000 | 0,775     | 17,927 | 683 | 0,0000 |
| 8      | 0,505 | 0,768    | 14,386 | 683 | 0,0000 | 0,658     | 8,401  | 683 | 0,0000 |
| 16     | 0,505 | 0,747    | 13,360 | 683 | 0,0000 | 0,538     | 1,812  | 683 | 0,0704 |
| 32     | 0,598 | 0,721    | 6,691  | 683 | 0,0000 | 0,396     | 10,982 | 683 | 0,0000 |

**ND2 3rd codon positions:**

| NumOTU | Iss   | Iss.cSym | T      | DF  | P      | Iss.cAsym | T      | DF  | P      |
|--------|-------|----------|--------|-----|--------|-----------|--------|-----|--------|
| 4      | 0,778 | 0,784    | 0,226  | 341 | 0,8212 | 0,756     | 0,810  | 341 | 0,4185 |
| 8      | 0,828 | 0,737    | 3,275  | 341 | 0,0012 | 0,627     | 7,222  | 341 | 0,0000 |
| 16     | 1,031 | 0,689    | 12,631 | 341 | 0,0000 | 0,481     | 20,299 | 341 | 0,0000 |
| 32     | 1,037 | 0,685    | 13,325 | 341 | 0,0000 | 0,356     | 25,823 | 341 | 0,0000 |

**ND3 1st+2nd codon positions:**

| NumOTU | Iss   | Iss.cSym | T      | DF  | P      | Iss.cAsym | T      | DF  | P      |
|--------|-------|----------|--------|-----|--------|-----------|--------|-----|--------|
| 4      | 0,367 | 0,777    | 16,360 | 233 | 0,0000 | 0,761     | 15,719 | 233 | 0,0000 |
| 8      | 0,332 | 0,732    | 15,880 | 233 | 0,0000 | 0,630     | 11,819 | 233 | 0,0000 |
| 16     | 0,379 | 0,656    | 10,371 | 233 | 0,0000 | 0,460     | 3,005  | 233 | 0,0029 |
| 32     | 0,415 | 0,684    | 10,433 | 233 | 0,0000 | 0,362     | 2,066  | 233 | 0,0400 |

**ND3 3rd codon positions:**

| NumOTU | Iss   | Iss.cSym | T     | DF  | P      | Iss.cAsym | T      | DF  | P      |
|--------|-------|----------|-------|-----|--------|-----------|--------|-----|--------|
| 4      | 0,669 | 0,793    | 2,773 | 116 | 0,0065 | 0,821     | 3,396  | 116 | 0,0009 |
| 8      | 0,770 | 0,773    | 0,069 | 116 | 0,9452 | 0,707     | 1,383  | 116 | 0,1694 |
| 16     | 0,826 | 0,599    | 4,990 | 116 | 0,0000 | 0,469     | 7,845  | 116 | 0,0000 |
| 32     | 0,950 | 0,763    | 4,278 | 116 | 0,0000 | 0,512     | 10,022 | 116 | 0,0000 |

**ND4L 1st+2nd codon positions:**

| NumOTU | Iss   | Iss.cSym | T      | DF  | P      | Iss.cAsym | T      | DF  | P      |
|--------|-------|----------|--------|-----|--------|-----------|--------|-----|--------|
| 4      | 0,330 | 0,780    | 17,564 | 157 | 0,0000 | 0,784     | 17,747 | 157 | 0,0000 |
| 8      | 0,334 | 0,745    | 14,305 | 157 | 0,0000 | 0,658     | 11,299 | 157 | 0,0000 |
| 16     | 0,349 | 0,623    | 10,092 | 157 | 0,0000 | 0,454     | 3,879  | 157 | 0,0002 |
| 32     | 0,432 | 0,712    | 10,365 | 157 | 0,0000 | 0,417     | 0,545  | 157 | 0,5863 |

**ND4L 3rd codon positions:**

| NumOTU | Iss   | Iss.cSym | T     | DF | P      | Iss.cAsym | T     | DF | P      |
|--------|-------|----------|-------|----|--------|-----------|-------|----|--------|
| 4      | 0,659 | 0,833    | 3,248 | 78 | 0,0017 | 0,903     | 4,560 | 78 | 0,0000 |
| 8      | 0,707 | 0,848    | 2,665 | 78 | 0,0093 | 0,823     | 2,189 | 78 | 0,0316 |
| 16     | 0,793 | 0,573    | 4,465 | 78 | 0,0000 | 0,524     | 5,454 | 78 | 0,0000 |
| 32     | 0,839 | 0,891    | 1,139 | 78 | 0,2580 | 0,739     | 2,217 | 78 | 0,0296 |

**ND4 1st+2nd codon positions:**

| NumOTU | Iss   | Iss.cSym | T      | DF  | P      | Iss.cAsym | T      | DF  | P      |
|--------|-------|----------|--------|-----|--------|-----------|--------|-----|--------|
| 4      | 0,344 | 0,816    | 31,298 | 895 | 0,0000 | 0,785     | 29,198 | 895 | 0,0000 |
| 8      | 0,357 | 0,782    | 24,785 | 895 | 0,0000 | 0,675     | 18,555 | 895 | 0,0000 |
| 16     | 0,402 | 0,765    | 18,447 | 895 | 0,0000 | 0,563     | 8,178  | 895 | 0,0000 |
| 32     | 0,407 | 0,740    | 15,626 | 895 | 0,0000 | 0,428     | 0,971  | 895 | 0,3318 |

**ND4 3rd codon positions:**

| NumOTU | Iss   | Iss.cSym | T     | DF  | P      | Iss.cAsym | T      | DF  | P      |
|--------|-------|----------|-------|-----|--------|-----------|--------|-----|--------|
| 4      | 0,682 | 0,792    | 4,404 | 447 | 0,0000 | 0,759     | 3,068  | 447 | 0,0023 |
| 8      | 0,750 | 0,747    | 0,111 | 447 | 0,9118 | 0,635     | 4,355  | 447 | 0,0000 |
| 16     | 0,811 | 0,711    | 3,659 | 447 | 0,0003 | 0,502     | 11,350 | 447 | 0,0000 |
| 32     | 0,834 | 0,696    | 4,726 | 447 | 0,0000 | 0,369     | 15,958 | 447 | 0,0000 |

**ND5 1st+2nd codon positions:**

| NumOTU | Iss   | Iss.cSym | T      | DF   | P      | Iss.cAsym | T      | DF   | P      |
|--------|-------|----------|--------|------|--------|-----------|--------|------|--------|
| 4      | 0,390 | 0,826    | 28,458 | 1161 | 0,0000 | 0,794     | 26,372 | 1161 | 0,0000 |
| 8      | 0,375 | 0,796    | 23,303 | 1161 | 0,0000 | 0,692     | 17,559 | 1161 | 0,0000 |
| 16     | 0,413 | 0,780    | 17,244 | 1161 | 0,0000 | 0,587     | 8,194  | 1161 | 0,0000 |
| 32     | 0,473 | 0,758    | 11,503 | 1161 | 0,0000 | 0,461     | 0,452  | 1161 | 0,6514 |

**ND5 3rd codon positions:**

| NumOTU | Iss   | Iss.cSym | T     | DF  | P      | Iss.cAsym | T      | DF  | P      |
|--------|-------|----------|-------|-----|--------|-----------|--------|-----|--------|
| 4      | 0,723 | 0,801    | 3,337 | 580 | 0,0009 | 0,769     | 1,964  | 580 | 0,0501 |
| 8      | 0,823 | 0,759    | 2,356 | 580 | 0,0188 | 0,648     | 6,451  | 580 | 0,0000 |
| 16     | 0,885 | 0,734    | 4,978 | 580 | 0,0000 | 0,524     | 11,951 | 580 | 0,0000 |
| 32     | 0,973 | 0,710    | 7,593 | 580 | 0,0000 | 0,382     | 17,075 | 580 | 0,0000 |

**ND6 1st+2nd codon positions:**

| NumOTU | Iss | Iss.cSym | T | DF | P | Iss.cAsym | T | DF | P |
|--------|-----|----------|---|----|---|-----------|---|----|---|
|--------|-----|----------|---|----|---|-----------|---|----|---|

---



---

|    |       |       |        |     |           |       |        |     |        |
|----|-------|-------|--------|-----|-----------|-------|--------|-----|--------|
| 4  | 0,463 | 0,781 | 12,219 | 307 | 0,0000    | 0,756 | 11,237 | 307 | 0,0000 |
| 8  | 0,528 | 0,734 | 7,426  | 307 | 111,3362  | 0,626 | 3,521  | 307 | 0,0005 |
| 16 | 0,564 | 0,680 | 4,021  | 307 | 728760384 | 0,474 | 3,118  | 307 | 0,0020 |
| 32 | 0,632 | 0,683 | 1,713  | 307 | 0,0877    | 0,354 | 9,373  | 307 | 0,0002 |

**ND6 3rd codon positions:**

| NumOTU | Iss   | Iss.cSym | T      | DF  | P         | Iss.cAsym | T      | DF  | P        |
|--------|-------|----------|--------|-----|-----------|-----------|--------|-----|----------|
| 4      | 0,847 | 0,781    | 1,620  | 152 | 0,1073    | 0,788     | 1,454  | 152 | 0,1479   |
| 8      | 0,986 | 0,747    | 5,532  | 152 | 13484792, | 0,662     | 7,495  | 152 | 510,3412 |
| 16     | 1,049 | 0,620    | 10,045 | 152 | 0,0002    | 0,455     | 13,912 | 152 | 0,0000   |
| 32     | 1,118 | 0,716    | 9,303  | 152 | 0,0014    | 0,425     | 16,021 | 152 | 0,0000   |

Interpretation of results:

Significant Difference

-----  
 Yes                      No

-----  
 Iss < Iss.c    Little                      Substantial  
                   saturation                      saturation  
 -----

Complete nucleotide mitogenome alignment sequences

Partitioned PCG with codon partition

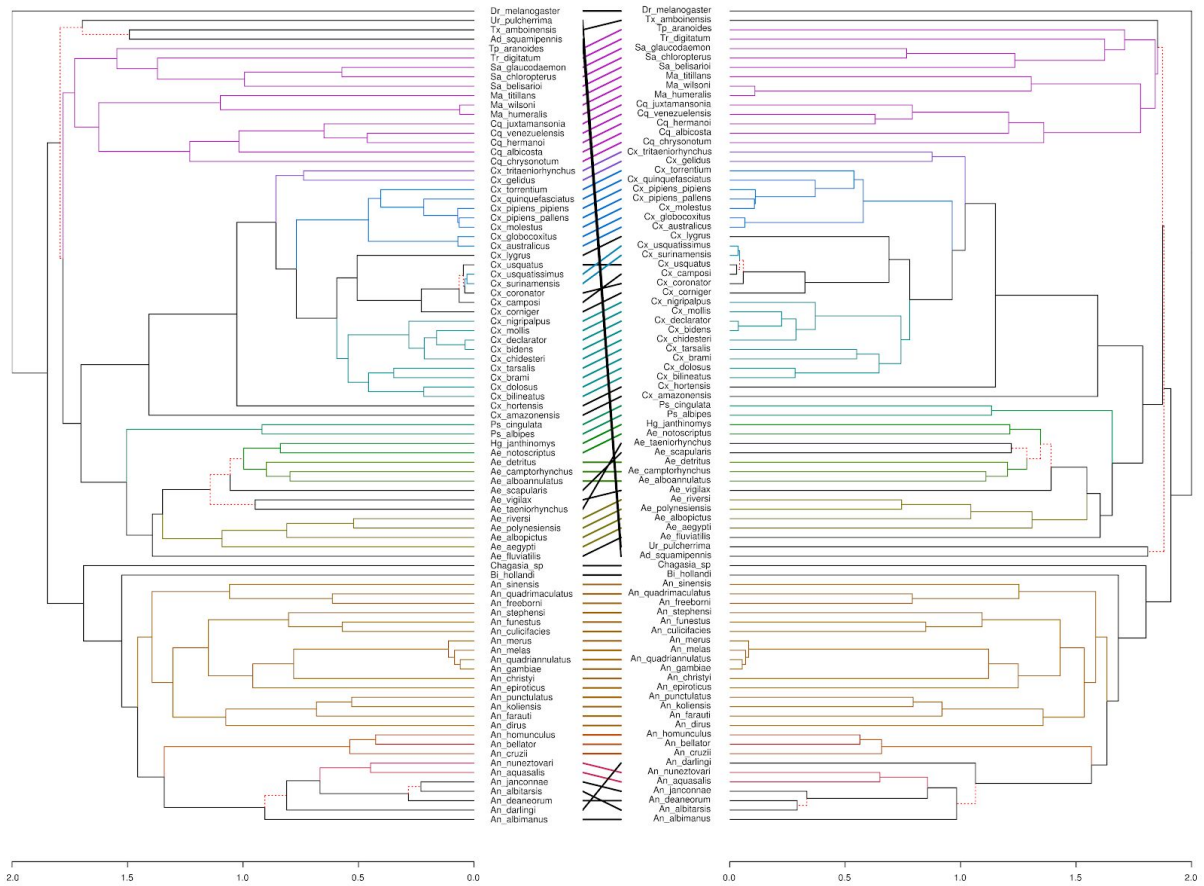

**Supplementary figure 1.** Comparative dendrogram topologies of trees obtained from different approaches using complete nucleotide mitogenomes and PCG with codon partition in the BEAST analysis. Dashed red lines show the branches that were different between the approaches used.

**Concatenated predicted amino acid sequences**

**Partitioned predicted amino acid sequences**

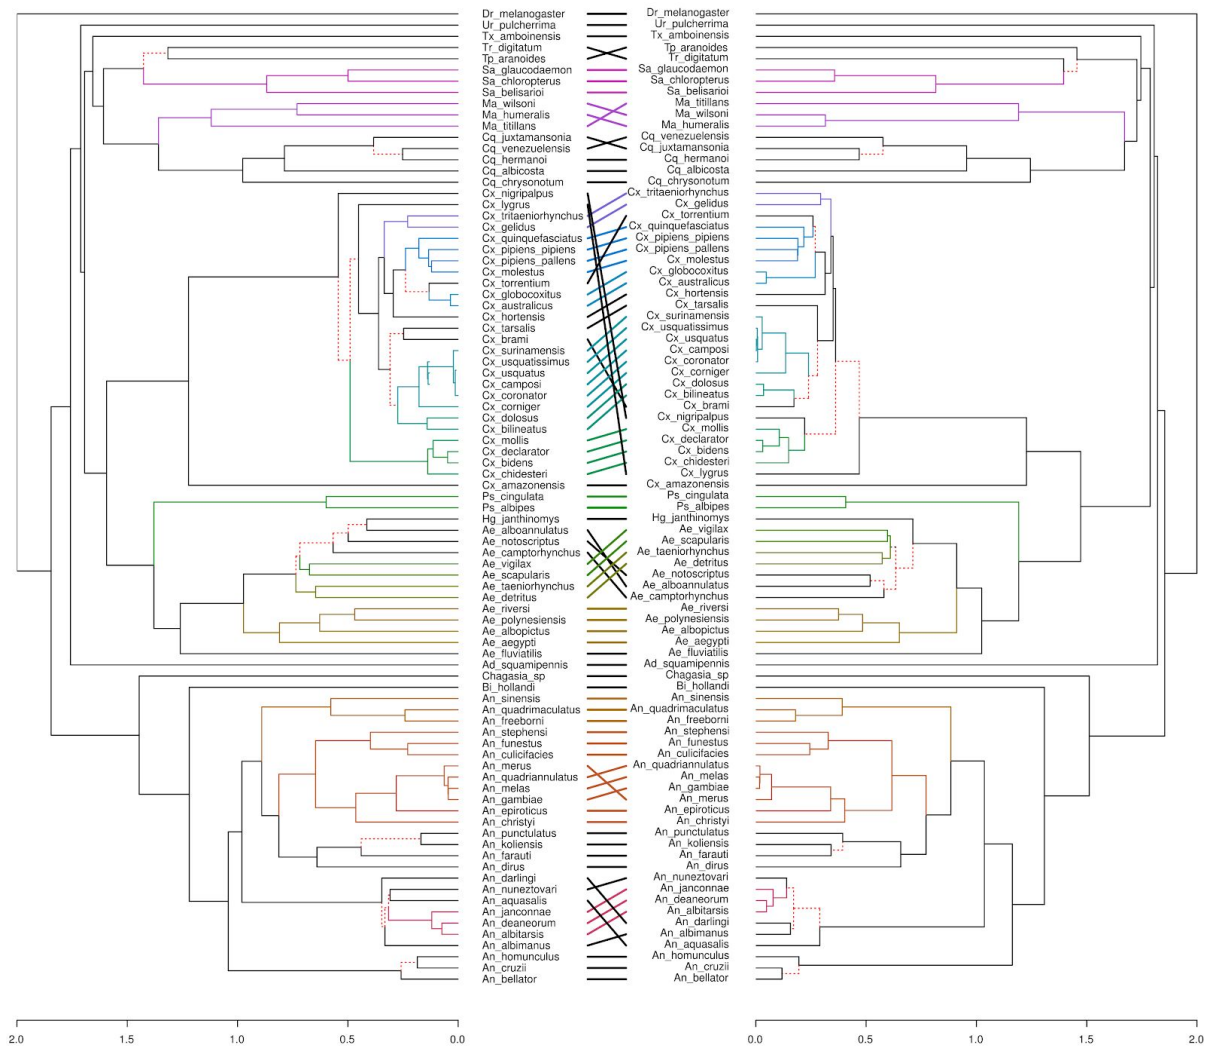

**Supplementary figure 2.** Comparative dendrogram topologies of trees obtained from different approaches using concatenated predicted amino acid sequences and partitioned predicted amino acid sequences in the BEAST analysis. Dashed red lines show the branches that were different between the approaches used.

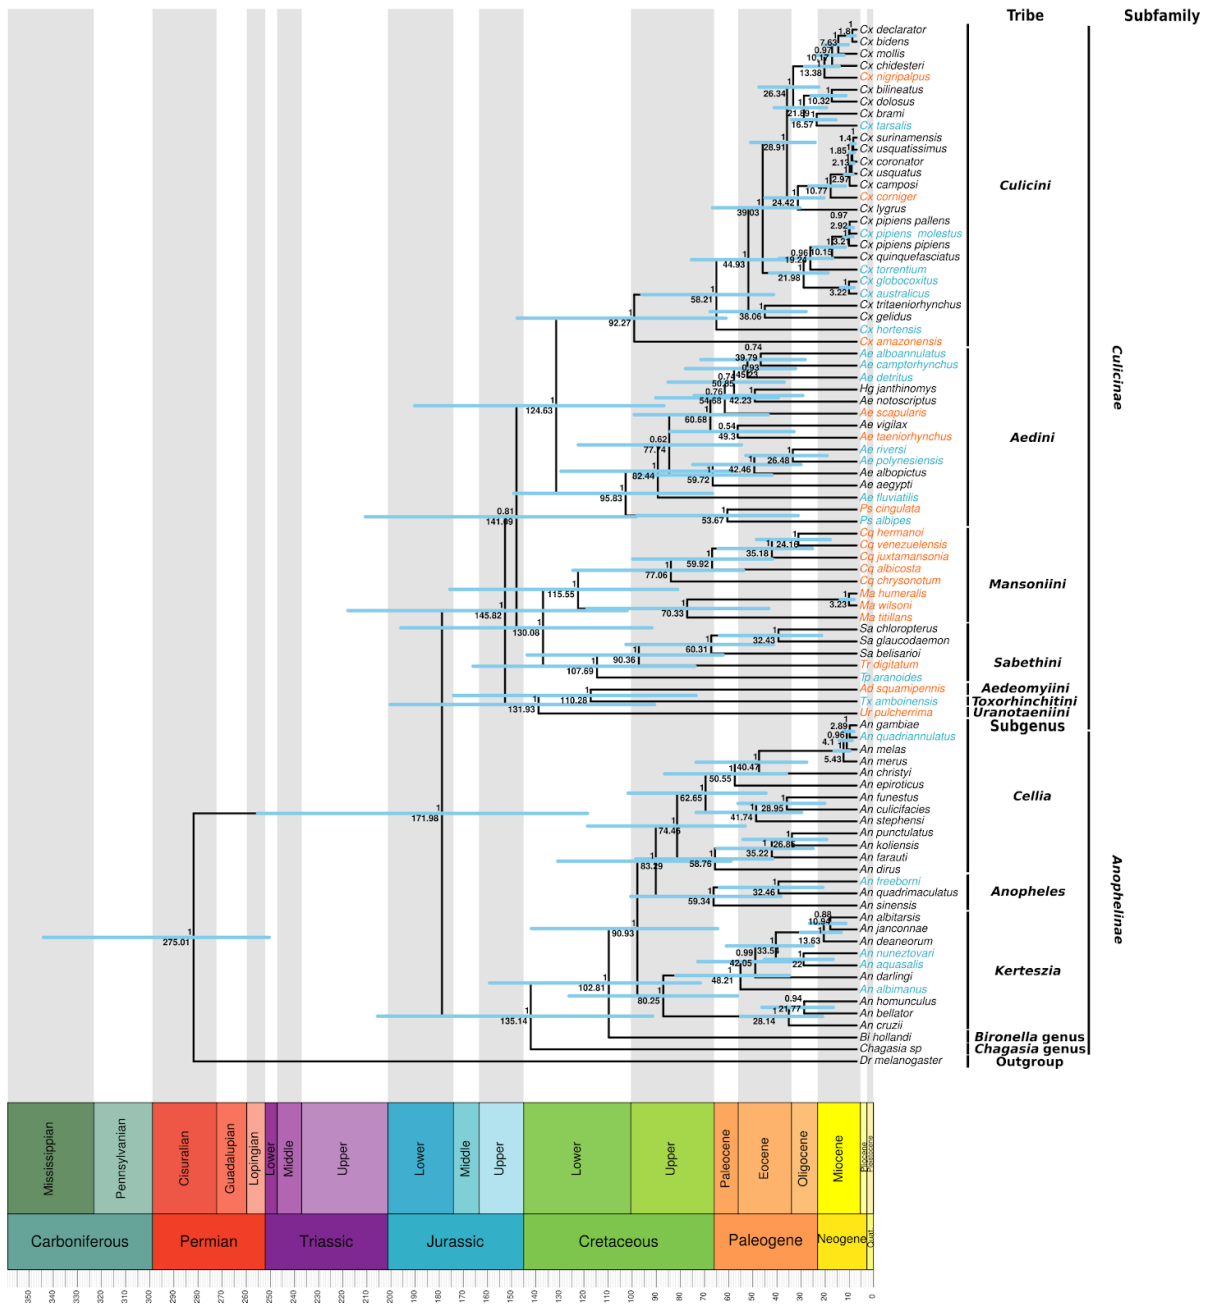

**Supplementary figure 3.** Evolutionary timescale of the Culicidae family based on BEAST analysis using complete mitogenome sequences. Blue bars represent the HPD95%. The numbers above and below the bars show the posterior probability and the predicted median dating respectively for each node. Light blue tip names represent mitogenomes characterized from SRA data. Orange tip names represent sequenced mitogenomes from this study.



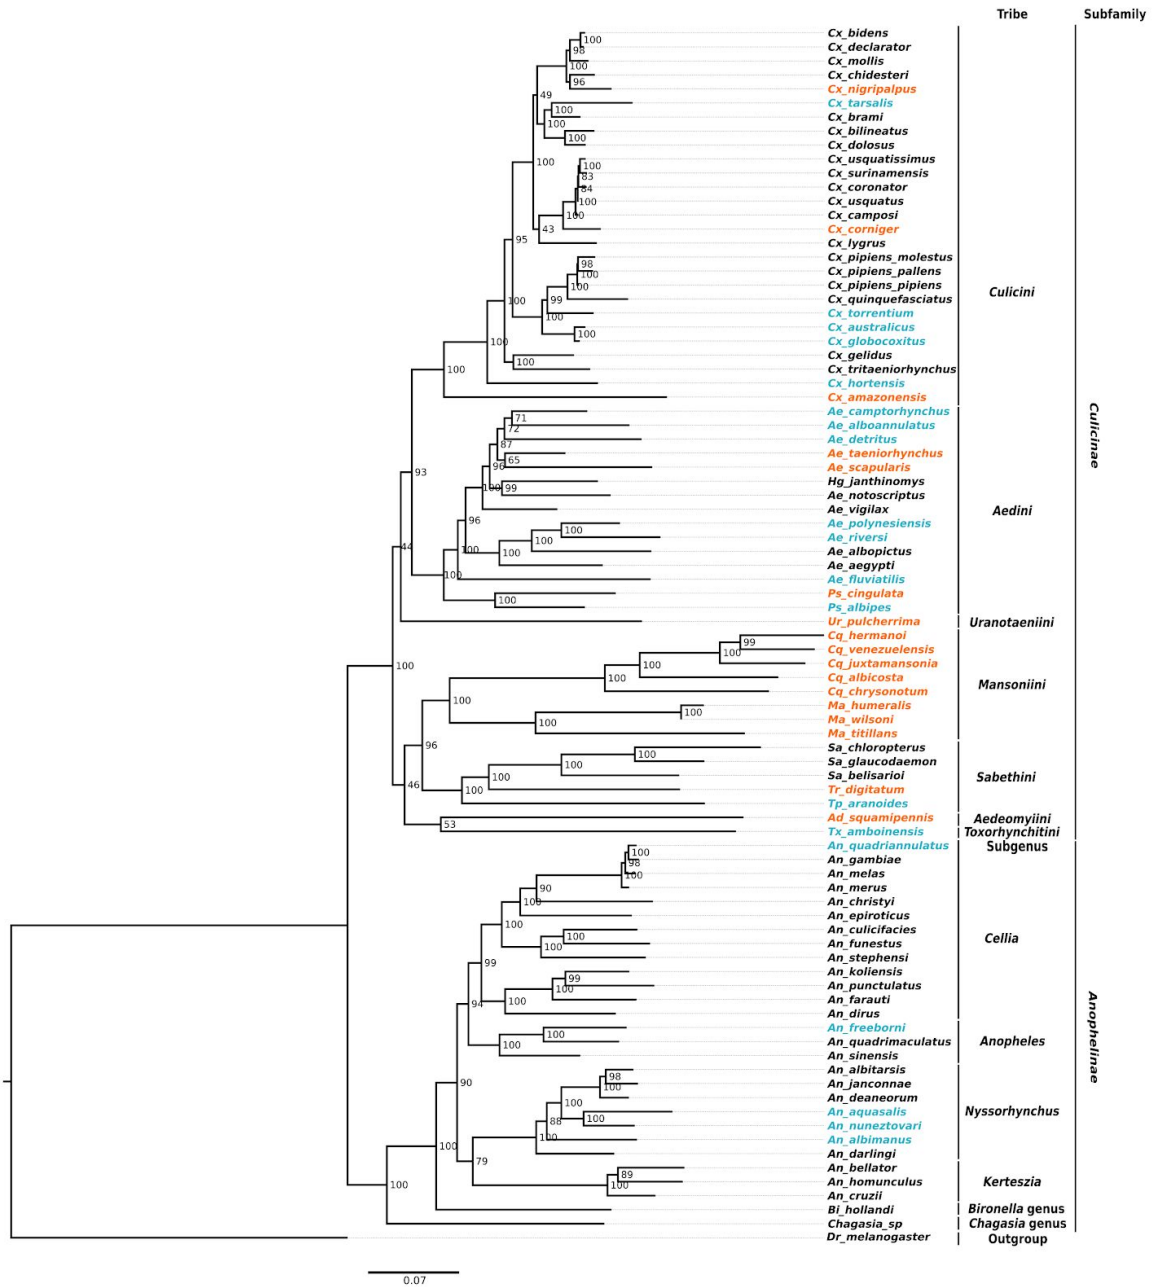

**Supplementary figure 4.** Maximum likelihood phylogenetic tree reconstructed with IQ-TREE version 1.6.12 based on complete mitogenome sequences using the GTR+F+I+G4 evolutionary model and the ultrafast bootstrapping with 1000 replicates. Light blue tip names represent mitogenomes characterized from SRA data. Orange tip names represent sequenced mitogenomes from this study.

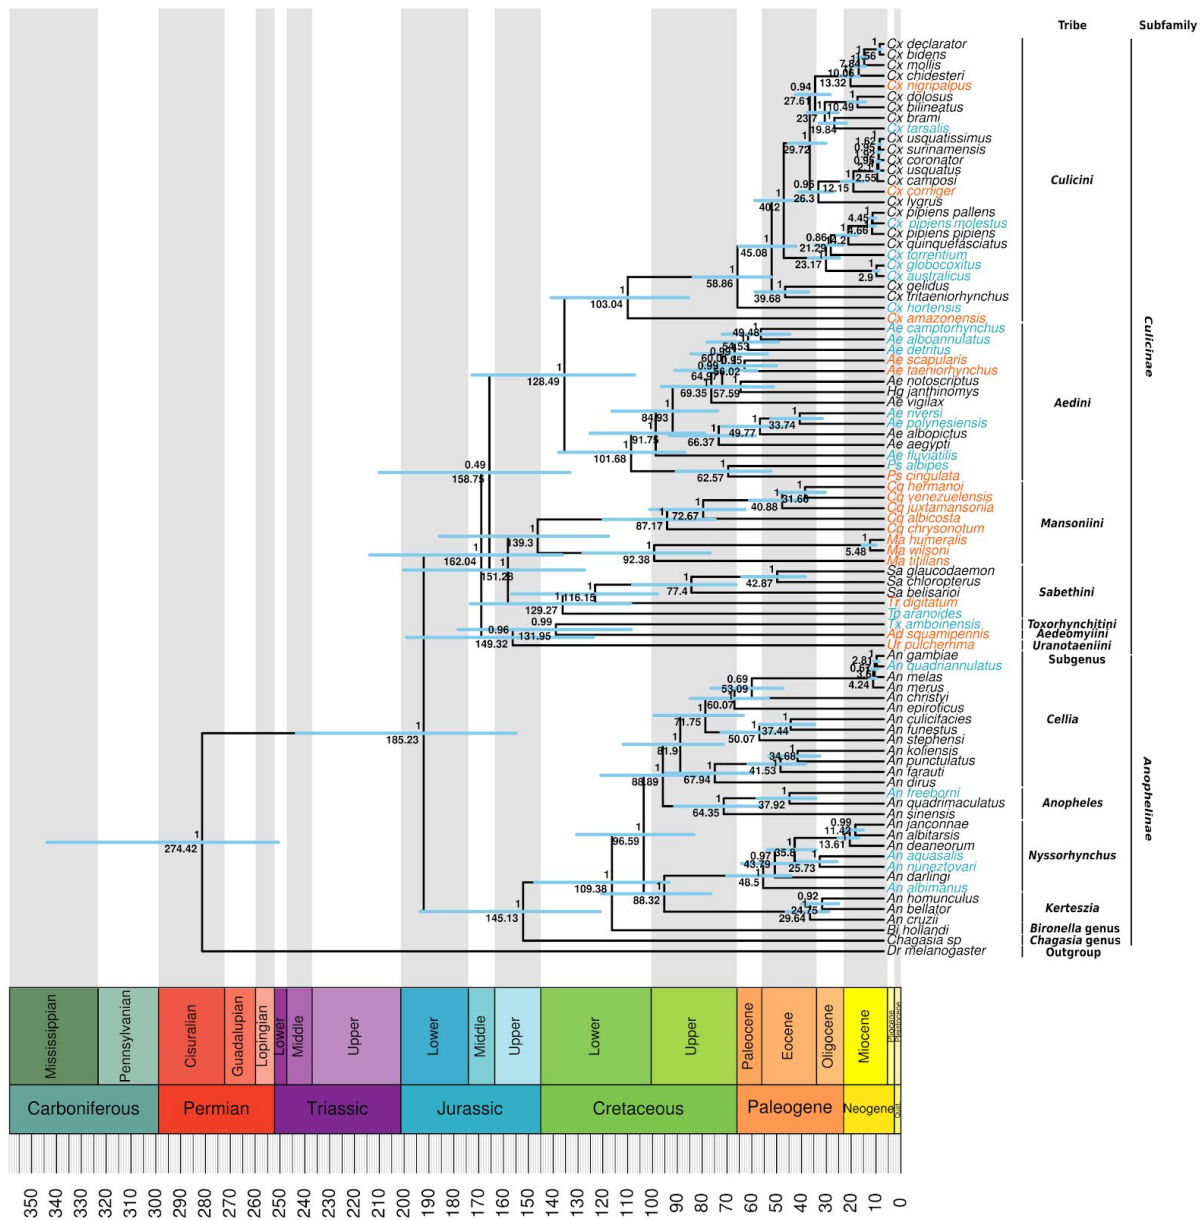

**Supplementary figure 5.** Evolutionary timescale of Culicidae family based on BEAST analysis using a partitioned scheme of PCG without codon partition. Blue bars represent the HPD95%. The numbers above and below the bars show the posterior probability and the predicted median dating respectively for each node. Light blue tip names represent mitogenomes characterized from SRA data. Orange tip names represent sequenced mitogenomes from this study.

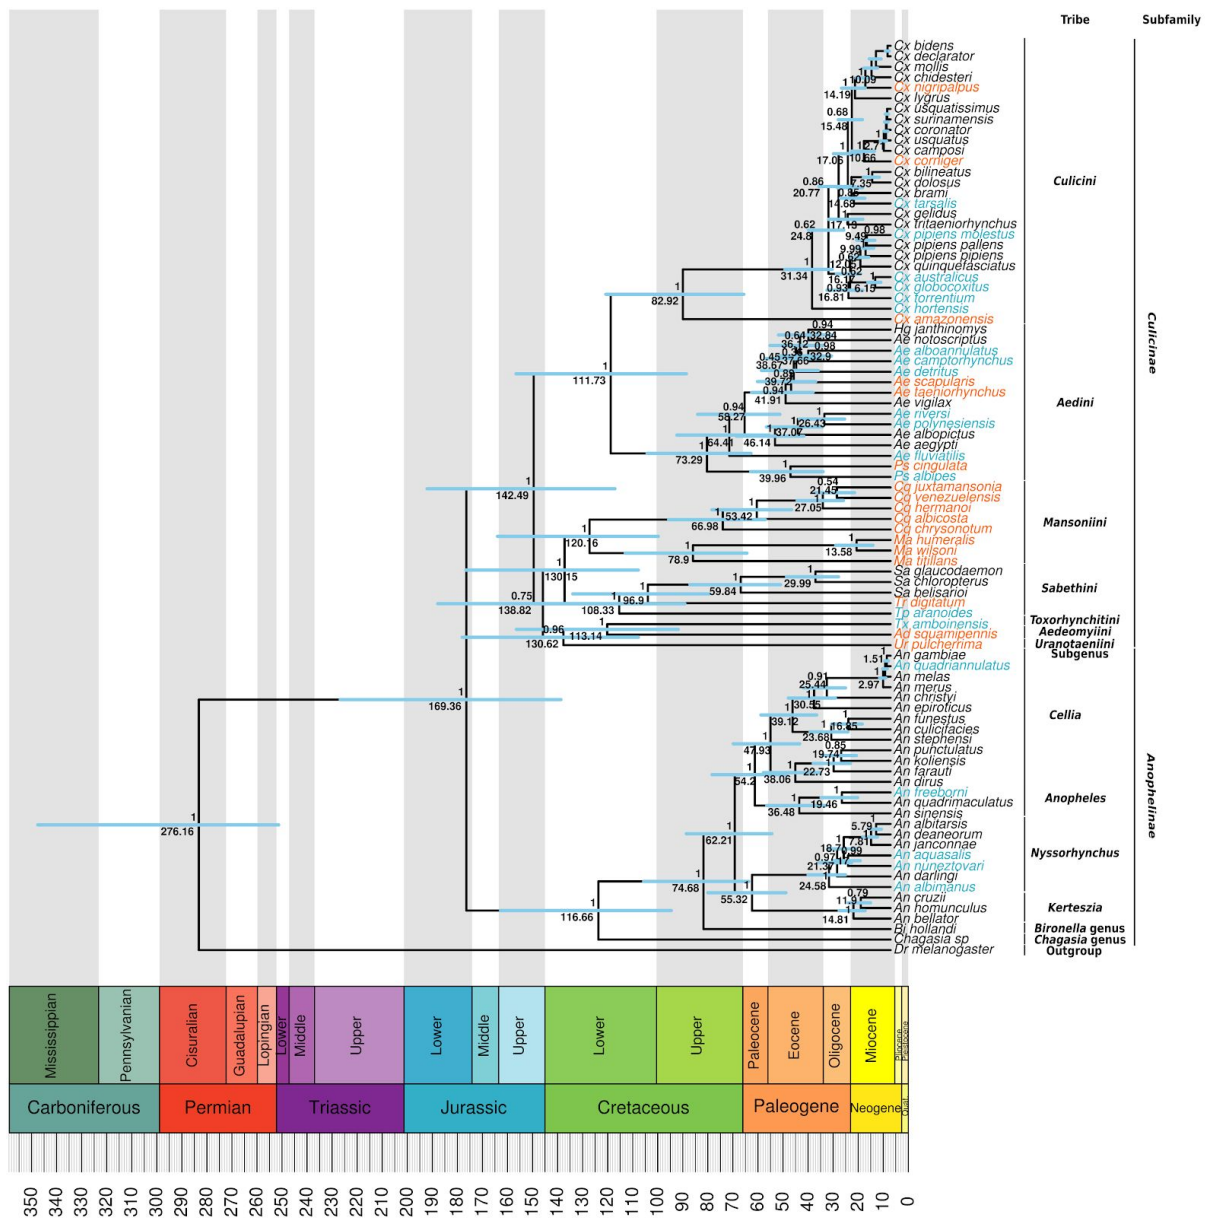

**Supplementary figure 6.** Evolutionary timescale of Culicidae family based on BEAST analysis using a partitioned scheme of PCG without 3rd codon positions. Blue bars represent the HPD95%. The numbers above and below the bars show the posterior probability and the predicted median dating respectively for each node. Light blue tip names represent mitogenomes characterized from SRA data. Orange tip names represent sequenced mitogenomes from this study.

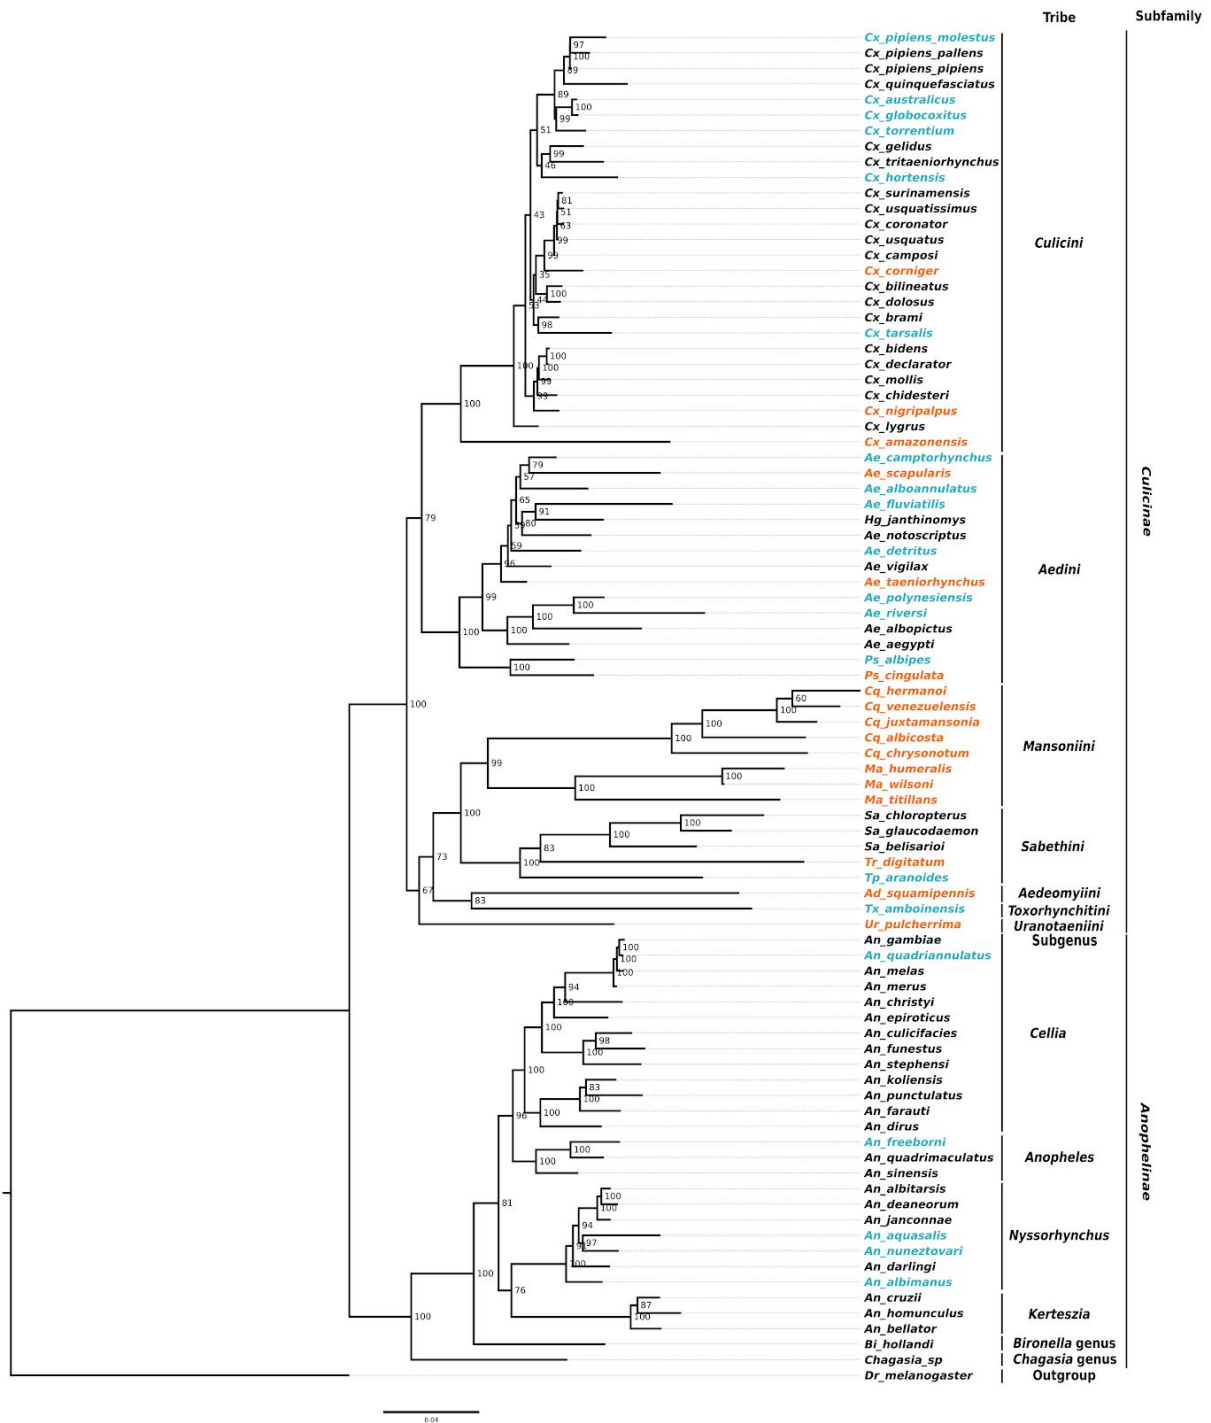

**Supplementary figure 7.** Maximum likelihood phylogenetic tree reconstructed with IQ-TREE version 1.6.12 based on concatenated PCG without 3rd codon positions using the GTR+F+I+G4 evolutionary model and the ultrafast bootstrapping with 1000 replicates. Light blue tip names represent mitogenomes characterized from SRA data. Orange tip names represent sequenced mitogenomes from this study.

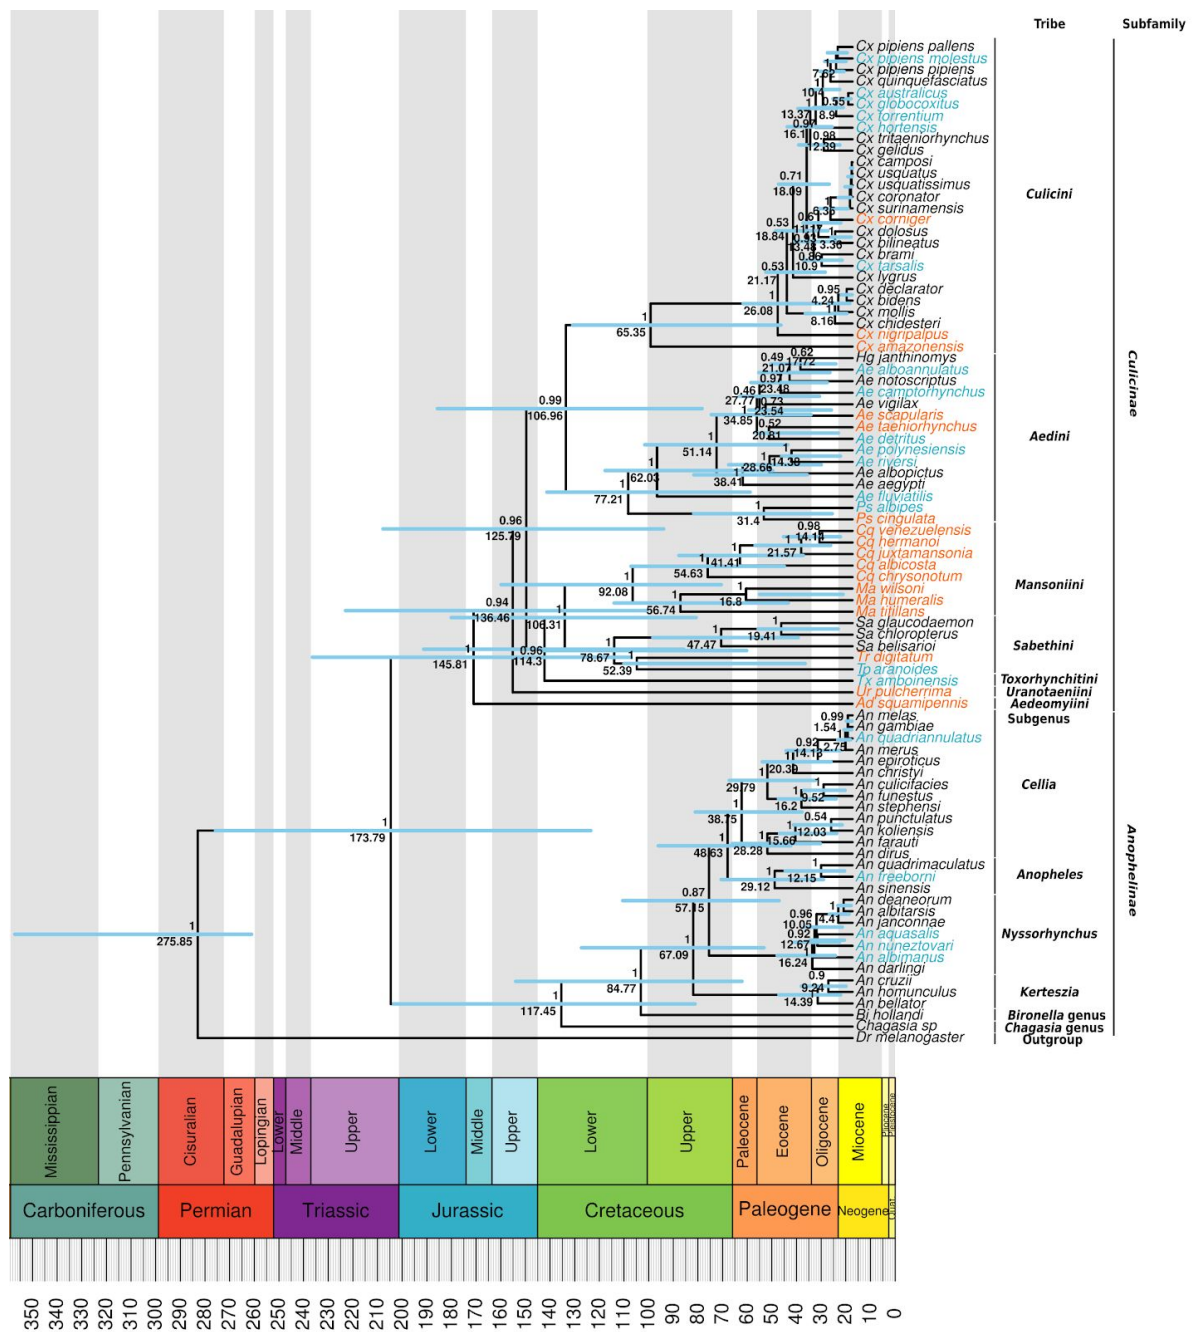

**Supplementary figure 8.** Evolutionary timescale of Culicidae family based on BEAST analysis using a concatenated predicted amino acid sequence. Blue bars represent the HPD95%. The numbers above and below the bars show the posterior probability and the predicted median dating respectively for each node. Light blue tip names represent mitogenomes characterized from SRA data. Orange tip names represent sequenced mitogenomes from this study.

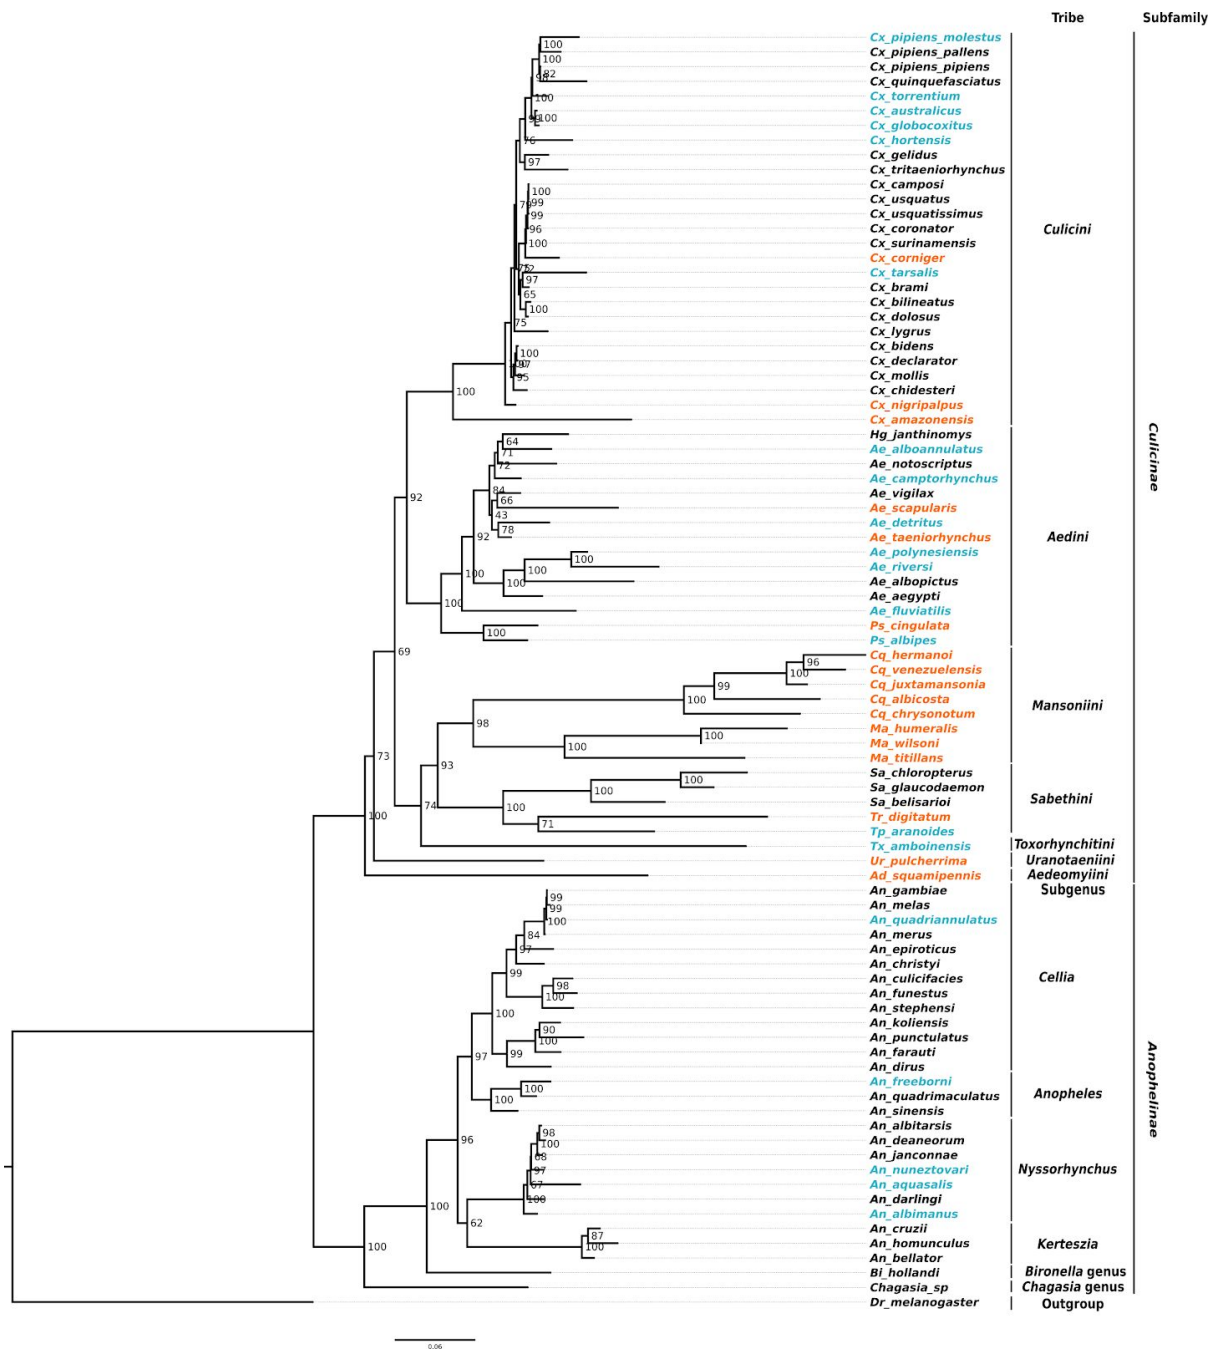

**Supplementary figure 9.** Phylogenetic tree of Maximum likelihood reconstructed with IQ-TREE version 1.6.12 based on concatenated predicted amino acid sequences using the mtInv+I+G4 evolutionary model and the ultrafast bootstrapping with 1000 replicates. Light blue tip names represent mitogenomes characterized from SRA data. Orange tip names represent sequenced mitogenomes from this study.

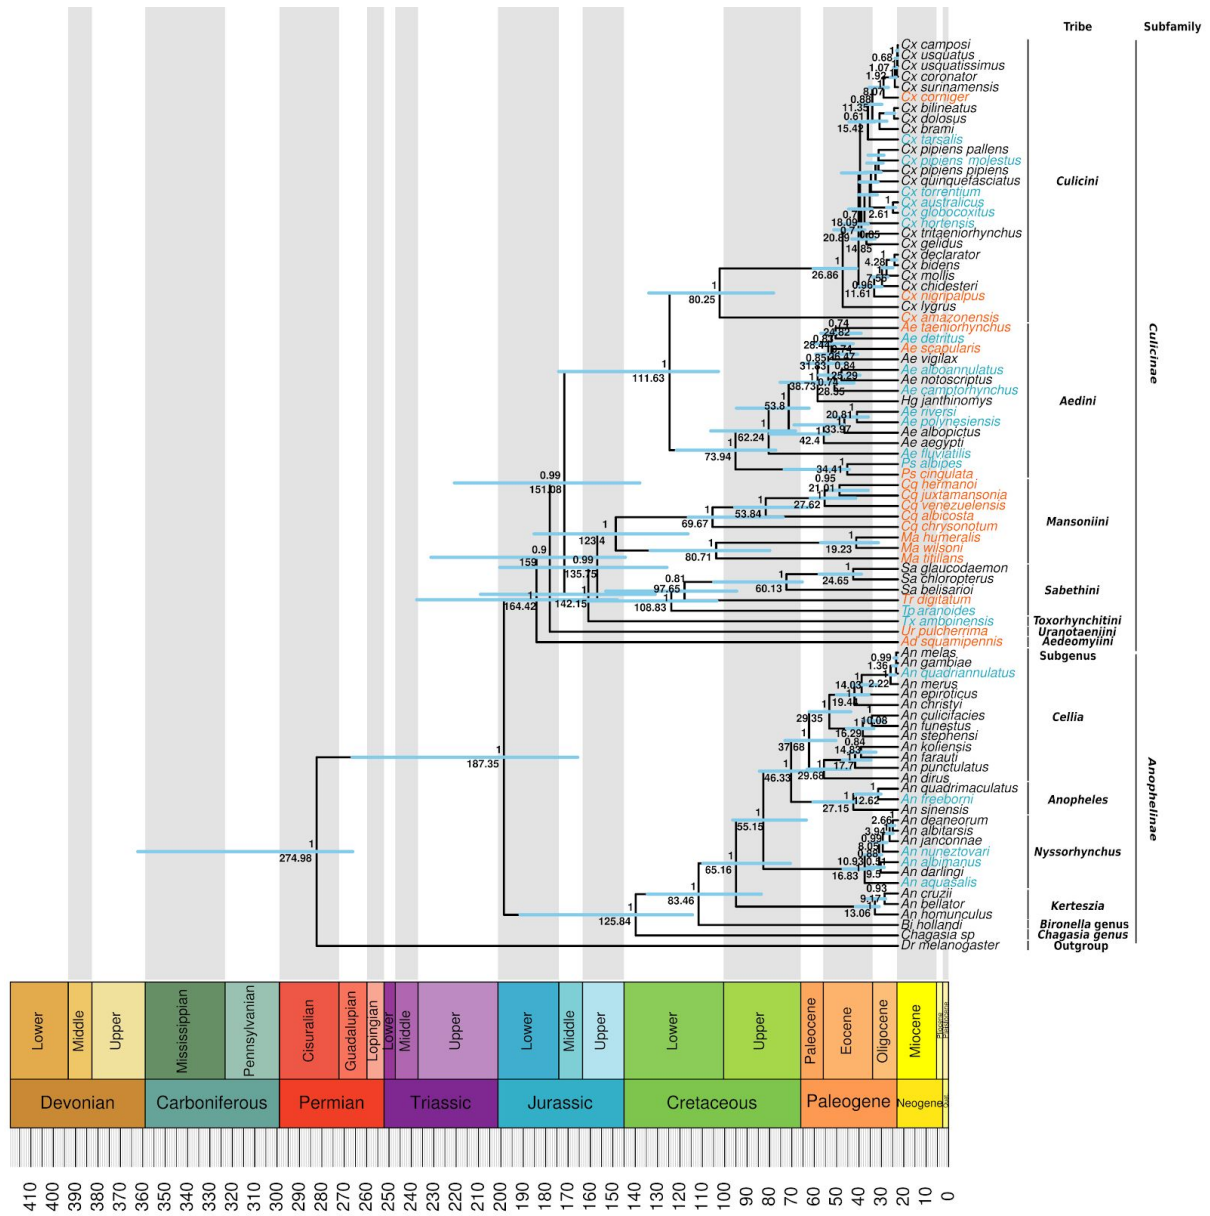

**Supplementary figure 10.** Evolutionary timescale of Culicidae family based on BEAST analysis using a partitioned scheme of predicted amino acid sequences. Blue bars represent the HPD95%. The numbers above and below the bars show the posterior probability and the predicted median dating respectively for each node. Light blue tip names represent mitogenomes characterized from SRA data. Orange tip names represent sequenced mitogenomes from this study.

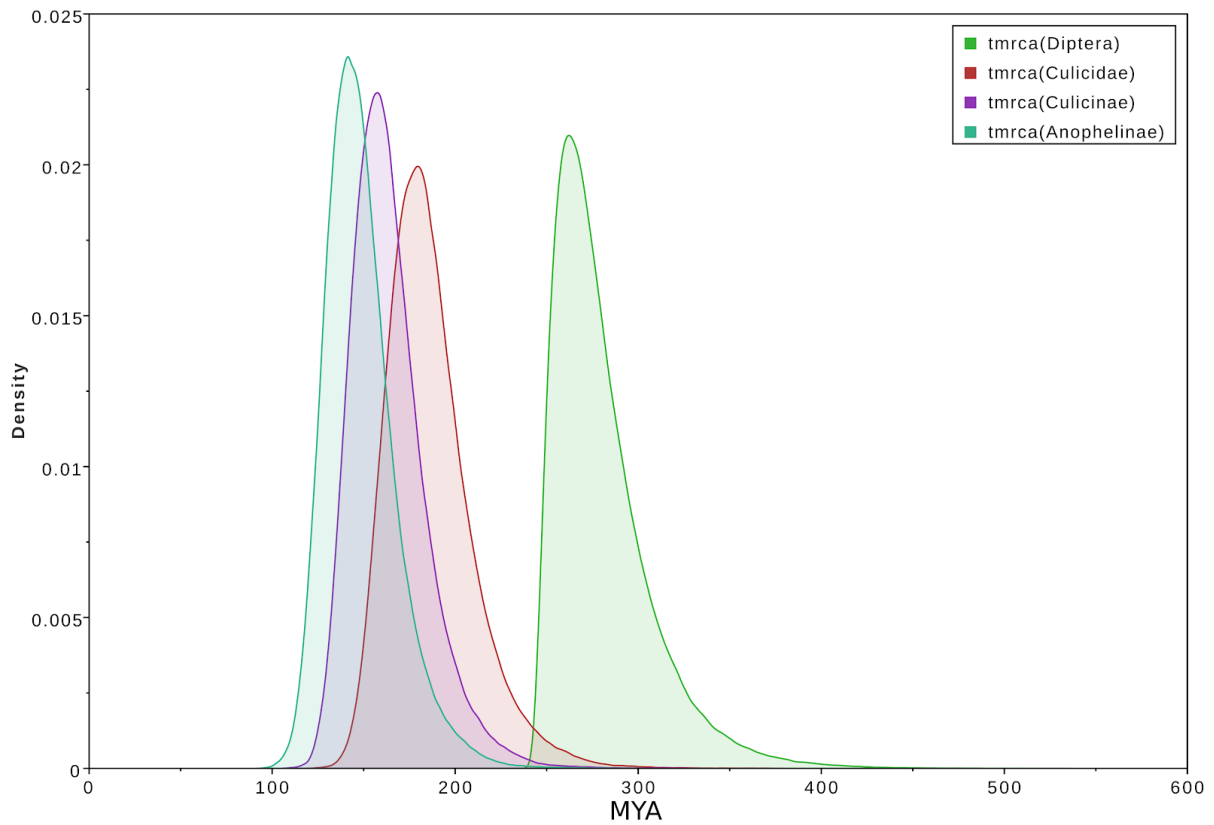

**Supplementary figure 11.** Density plot showing the 95% posterior distribution of ancestors time estimate based on the alignment of partitioned mitochondrial PCG with codon partition.

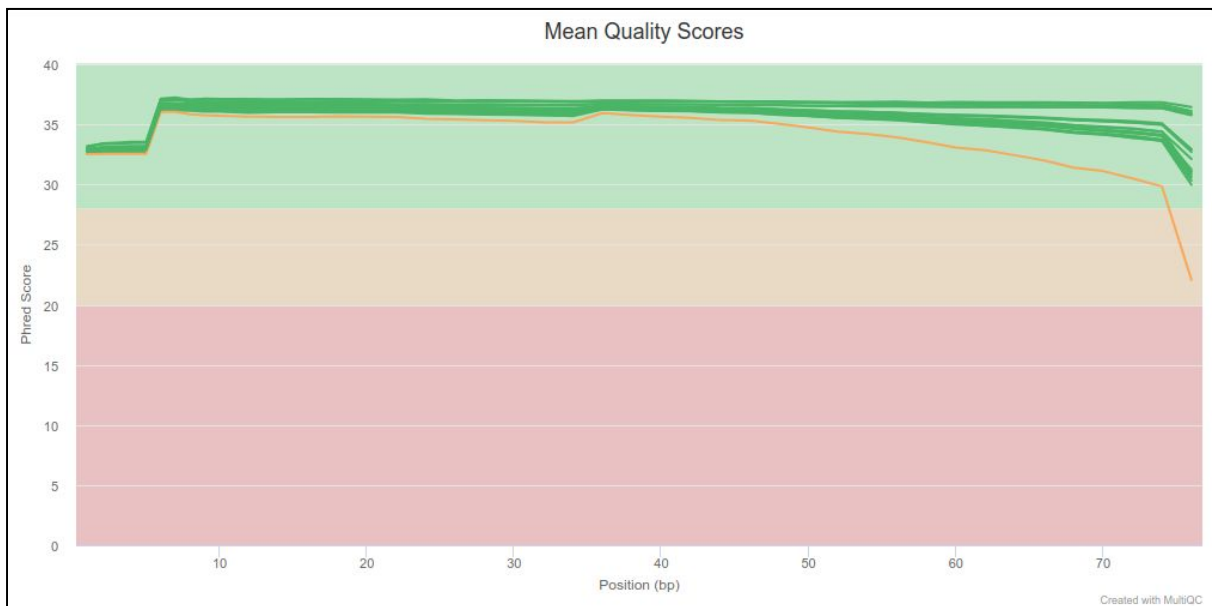

**Supplementary figure 12.** Quality of raw reads generated from mosquito samples. Figure generated from FasqQC results and summarized by MultiQC tool. The yellow line represents results from *Cq. albicosta* reads and green lines represent the remaining species.



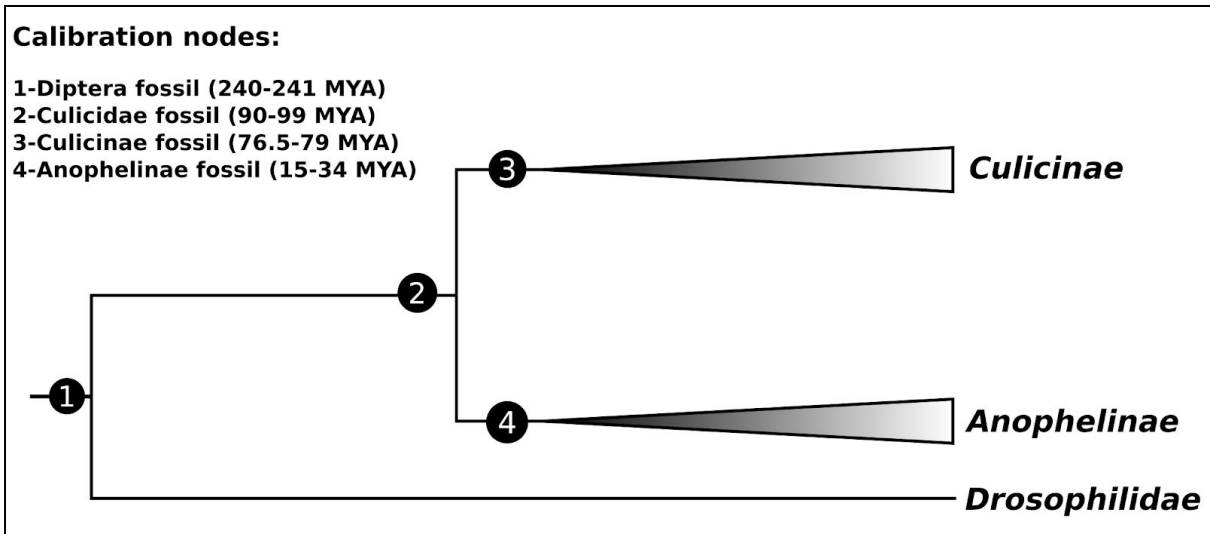

**Supplementary figure 13.** Schematic tree representing fossil dating used as calibration points in the molecular clock bayesian analyses. Circles with numbers inside represent each calibration point used based on the literature shown in Supplementary table 6.

## References:

1. Behura, S. K. et al. Complete sequences of mitochondria genomes of *Aedes aegypti* and *Culex quinquefasciatus* and comparative analysis of mitochondrial DNA fragments inserted in the nuclear genomes. *Insect Biochem Mol Biol.* **41**, 770-777 (2011).
2. Hardy, C., Court, L., Morgan, M. & Webb, C. The complete mitochondrial DNA genomes for two lineages of *Aedes notoscriptus* (Diptera: Culicidae). *Mitochondrial DNA Part A.* **27**, 2024–2025 (2016).
3. Hardy, C., Court, L. & Morgan, M. The complete mitochondrial DNA genome of *Aedes vigilax* (Diptera: Culicidae). *Mitochondrial DNA Part A.* **27**, 2552–2553 (2016).
4. Krzywinski, J. et al. Analysis of the evolutionary forces shaping mitochondrial genomes of a Neotropical malaria vector complex. *Mol. Phylogenet. Evol.* **58**, 469–477 (2011).
5. Oliveira, T. et al. Mitochondrial Genomes of Anopheles ( Kerteszia ) (Diptera: Culicidae) From the Atlantic Forest, Brazil. *J. Med. Entomol.* **53**, 790–797 (2016).
6. Peng, X.-Y., Zhou, P., Duan, X.-Y. & Qian, Z.-Q. The mitochondrial genomes of twelve Anopheles mosquitoes (Diptera: Culicidae) and their phylogenetic implications. *Conserv. Genet. Resour.* **8**, 387–390 (2016).
7. Hua, Y.-Q. et al. Sequencing and analysis of the complete mitochondrial genome in *Anopheles culicifacies* species B (Diptera: Culicidae). *Mitochondrial DNA Part A.* **27**, 2909–2910 (2016).
8. Moreno, M. et al. Complete mtDNA genomes of *Anopheles darlingi* and an approach to anopheline divergence time. *Malaria Journal.* **9**, 127 (2010).  
[doi.org/10.1186/1475-2875-9-127](https://doi.org/10.1186/1475-2875-9-127)

9. Logue, K. et al. Mitochondrial genome sequences reveal deep divergences among *Anopheles punctulatus* sibling species in Papua New Guinea. *Malaria Journal*. **12**, 64 (2013). doi.org/10.1186/1475-2875-12-64
10. Krzywinski, J., Grushko, O. G. & Besansky, N. J. Analysis of the complete mitochondrial DNA from *Anopheles funestus*: An improved dipteran mitochondrial genome annotation and a temporal dimension of mosquito evolution. *Mol. Phylogenet. Evol.* **39**, 417–423 (2006).
11. Beard, C. B., Hamm, D. M. & Collins, F. H. The mitochondrial genome of the mosquito *Anopheles gambiae*: DNA sequence, genome organization, and comparisons with mitochondrial sequences of other insects. *Insect Mol. Biol.* **2**, 103–124 (1993).
12. Mitchell, S. E., Cockburn, A. F. & Seawright, J. A. The mitochondrial genome of *Anopheles quadrimaculatus* species A: complete nucleotide sequence and gene organization. *Genome*. **36**, 1058–1073 (1993).
13. Foster, P. G. et al. Phylogeny of anophelinae using mitochondrial protein coding genes. *R. Soc. Open Sci.* **4**, 170758 (2017).
14. Sun, L. et al. Sequencing and analysis of the complete mitochondrial genome of *Culex gelidus* (Diptera: Culicidae). *Mitochondrial DNA Part B*. **2**, 477–479 (2017).
15. Demari-Silva, B. et al. Mitochondrial genomes and comparative analyses of *Culex camposi*, *Culex coronator*, *Culex usquatus* and *Culex usquatissimus* (Diptera: Culicidae), members of the coronator group. *BMC Genomics*. **16**, 831 (2015).
16. Luo, Q.-C. et al. The mitochondrial genomes of *Culex tritaeniorhynchus* and *Culex pipiens pallens* (Diptera: Culicidae) and comparison analysis with two other *Culex* species. *Parasites & Vectors*. **9**, 406 (2016). doi.org/10.1186/s13071-016-1694-z

17. Lewis, O., Farr, C. & Kaguni, L. *Drosophila melanogaster* mitochondrial DNA: completion of the nucleotide sequence and evolutionary comparisons. *Insect Mol. Biol.* **4**, 263–278 (1995).
18. Lemos, P. et al. Characterization of mitochondrial genome of *Haemagogus janthinomys* (Diptera: Culicidae). *Mitochondrial DNA Part A.* **28**, 50–51 (2017).
19. Aragão, A. de O. et al. Description and phylogeny of the mitochondrial genome of *Sabethes chloropterus*, *Sabethes glaucodaemon* and *Sabethes belisarioi* (Diptera: Culicidae). *Genomics.* **111**, 607-611 (2019). doi:10.1016/j.ygeno.2018.03.016
20. Krzemiński, W., Krzemińska, E. & Papier, F. *Grauvogelia arzvilleriana* sp. n. - the oldest Diptera species (Lower/Middle Triassic of France). *Acta Zool. Cracov.* **37**, 95–99 (1994).
21. Borkent, A. & Grimaldi, D. A. The Earliest Fossil Mosquito (Diptera: Culicidae), in Mid-Cretaceous Burmese Amber. *Ann. Entomol. Soc. Am.* **97**, 882–888 (2004).
22. Poinar, G. O., Zavortink, T. J., Pike, T. & Johnston, P. a. *Paleoculicis minutus* (Diptera: Culicidae) n. gen., n. sp., from Cretaceous Canadian amber, with a summary of described fossil mosquitoes. *Acta Geol. Hisp.* **35**, 119–128 (2000).
23. Zavortink, T. J. & Poinar, G. O. *Anopheles (Nyssorhynchus) dominicanus* sp. n. (Diptera: Culicidae) from Dominican Amber. *Ann. Entomol. Soc. Am.* **93**, 1230–1235 (2000).
